# Supplementary material for: Green Synthesis of Indeno[1,2-b]quinoxalines Using β-Cyclodextrin as Catalyst
Source: MDPI journal article supplement (doi:10.3390/molecules27020580), 2022-01-17
Supplement: s1 [file s1]

## Supplementary Materials

### The green synthesis of indeno[1,2-b]quinoxalines using $\beta$ -Cyclodextrin as catalyst

Li-Guo Liao <sup>1,2</sup>, Meng-Meng Song <sup>3</sup>, Jun-Feng Feng <sup>3</sup>, Min Tan <sup>1,2</sup>, Fan Liu <sup>1,2</sup>,

Zhen-jiang Qiu <sup>1,2</sup>, Sheng Zhang <sup>3,\*</sup> and Bang-jing Li <sup>1,2,\*</sup>

<sup>1</sup> Key Laboratory of Mountain Ecological Restoration and Bioresource Utilization, Chengdu Institute of Biology, Chinese Academy of Sciences, Chengdu 610041, China

<sup>2</sup> University of Chinese Academy of Sciences, Beijing 100049, China

<sup>3</sup> State Key Laboratory of Polymer Materials Engineering, Polymer Research Institute of Sichuan University, Chengdu 610065, China

\* Corresponding authors: zhangsheng@scu.edu.cn (S. Zhang), libj@cib.ac.cn (B.-J. Li)

## CONTENTS

|                                                                                       |               |
|---------------------------------------------------------------------------------------|---------------|
| 1.....                                                                                | NMR spectra   |
| Copies of <sup>1</sup> H NMR and <sup>13</sup> C NMR spectra of <b>2.3aa-bb</b> ..... | <b>2-18</b>   |
| 2.....                                                                                | HRMS spectra  |
| Copies of Mass Spectrum SmartFormula Report of <b>2.3aa-bb</b> .....                  | <b>19-27</b>  |
| 3.....                                                                                | NOESY spectra |
| Copies of the NOESY spectrums of <b>2.1a</b> mixed with $\beta$ -CD.....              | <b>27</b>     |
| Copies of the NOESY spectrums of <b>2.2a</b> mixed with $\beta$ -CD.....              | <b>28</b>     |
| Copies of the NOESY spectrums of <b>2.2j</b> mixed with $\beta$ -CD.....              | <b>28</b>     |
| 4.....                                                                                | HRMS spectra  |
| Copies of the HRMS of template reaction after 1h.....                                 | <b>29</b>     |

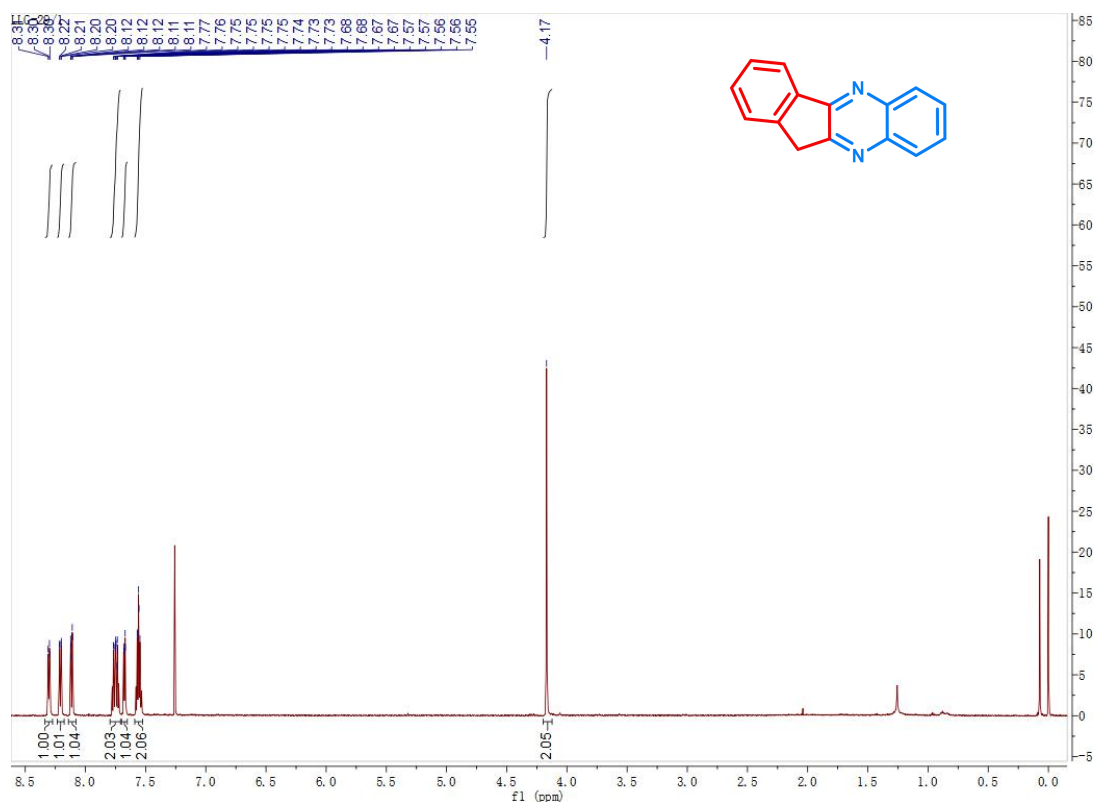

Figure S1. <sup>1</sup>H NMR spectrum of compound **2.3aa**.

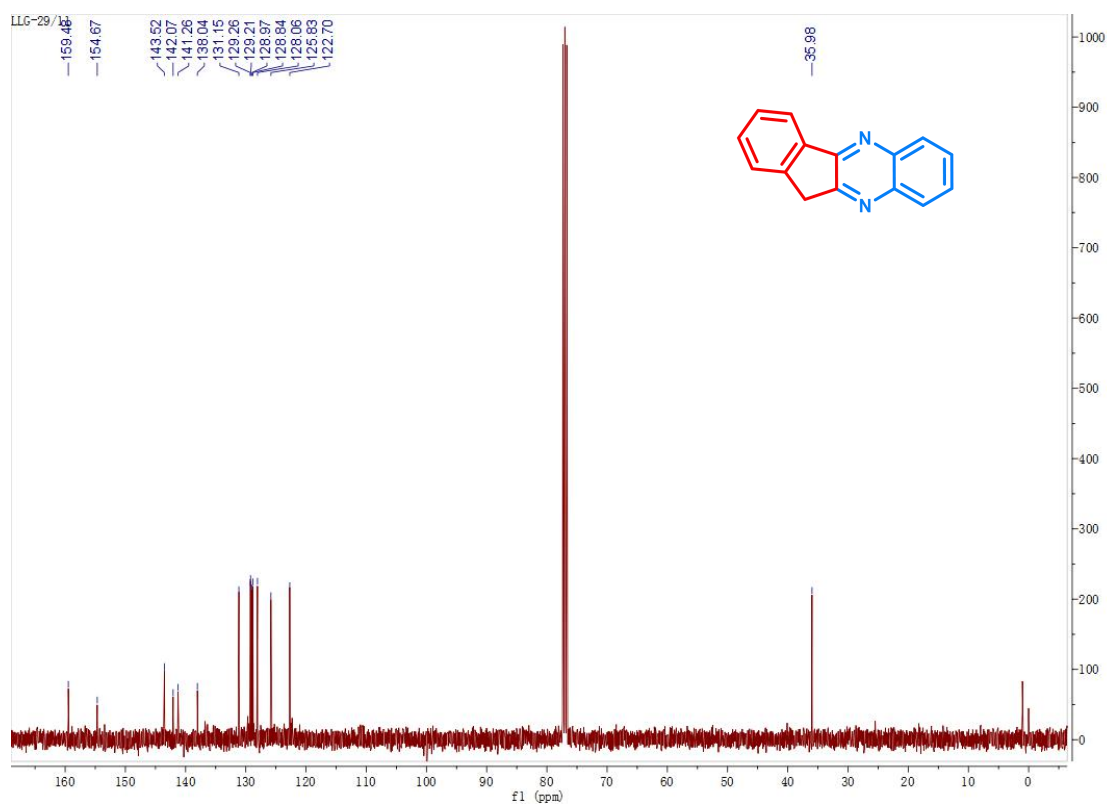

Figure S2. <sup>13</sup>C NMR spectrum of compound **2.3aa**.

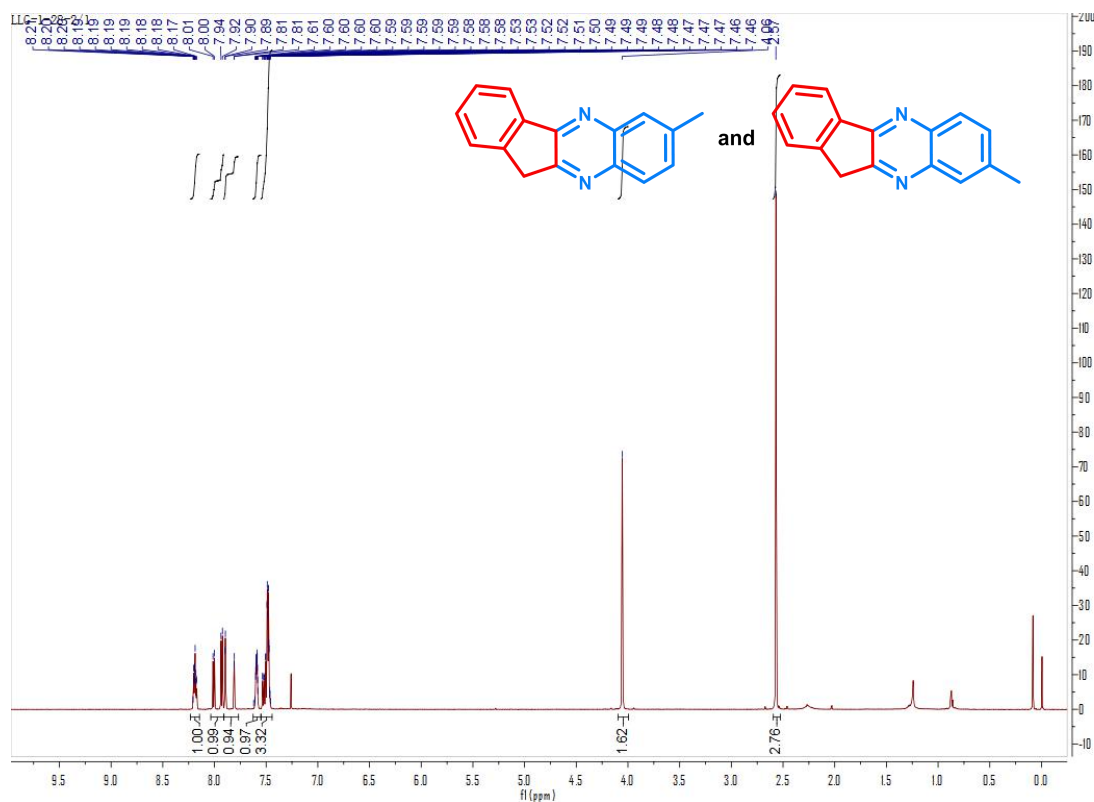

Figure S3.  $^1\text{H}$  NMR spectrum of compounds **2.3ab-1** and **2.3ab-2**.

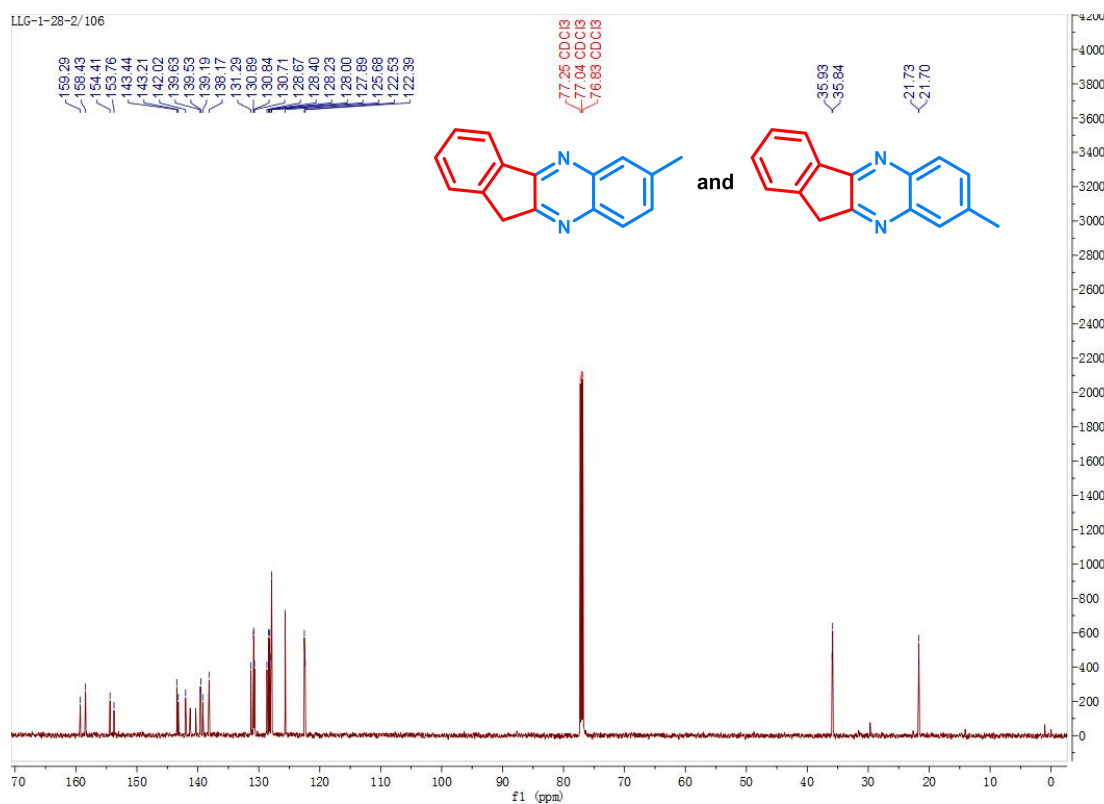

Figure S4.  $^{13}\text{C}$  NMR spectrum of compounds **2.3ab-1** and **2.3ab-2**.

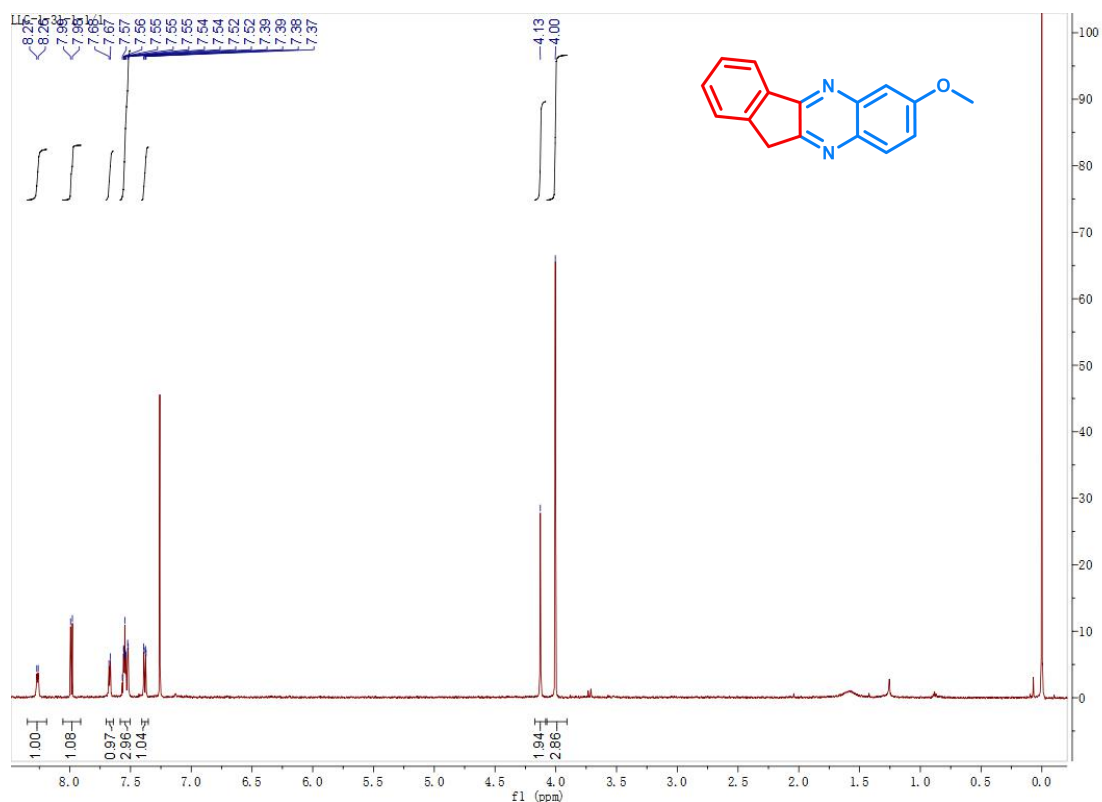

Figure S5. <sup>1</sup>H NMR spectrum of compound 2.3ac-1.

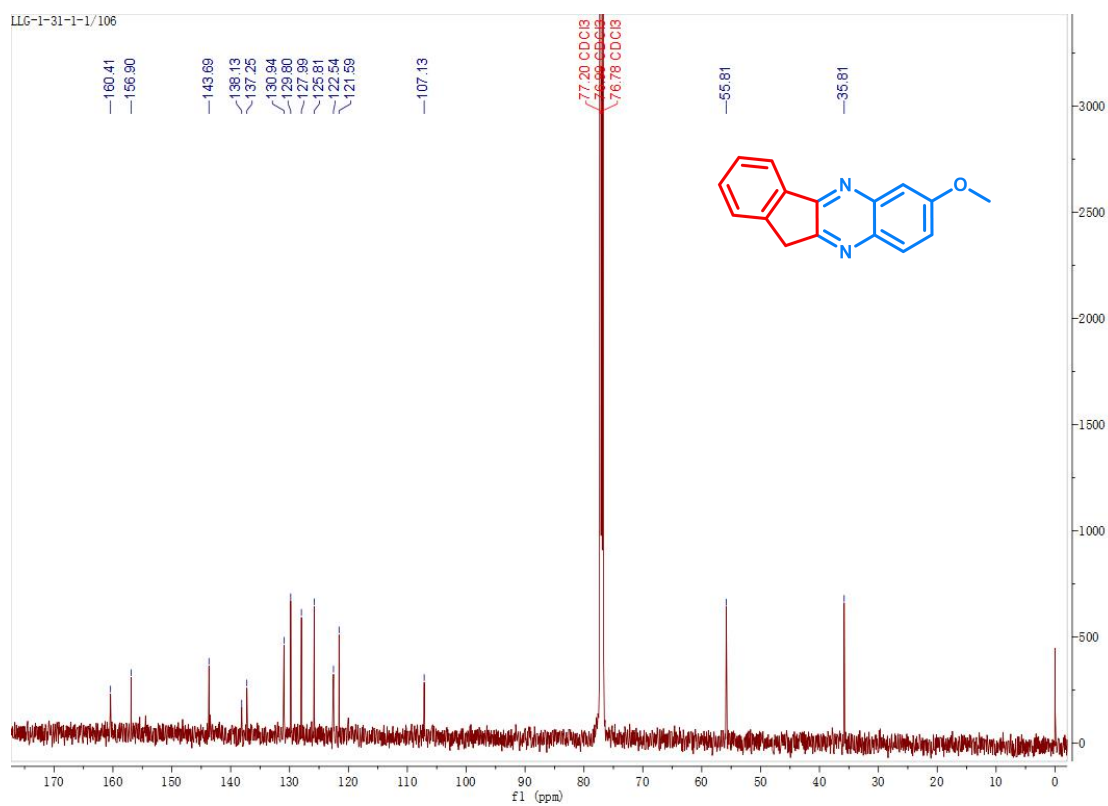

Figure S6. <sup>13</sup>C NMR spectrum of compound 2.3ac-1.

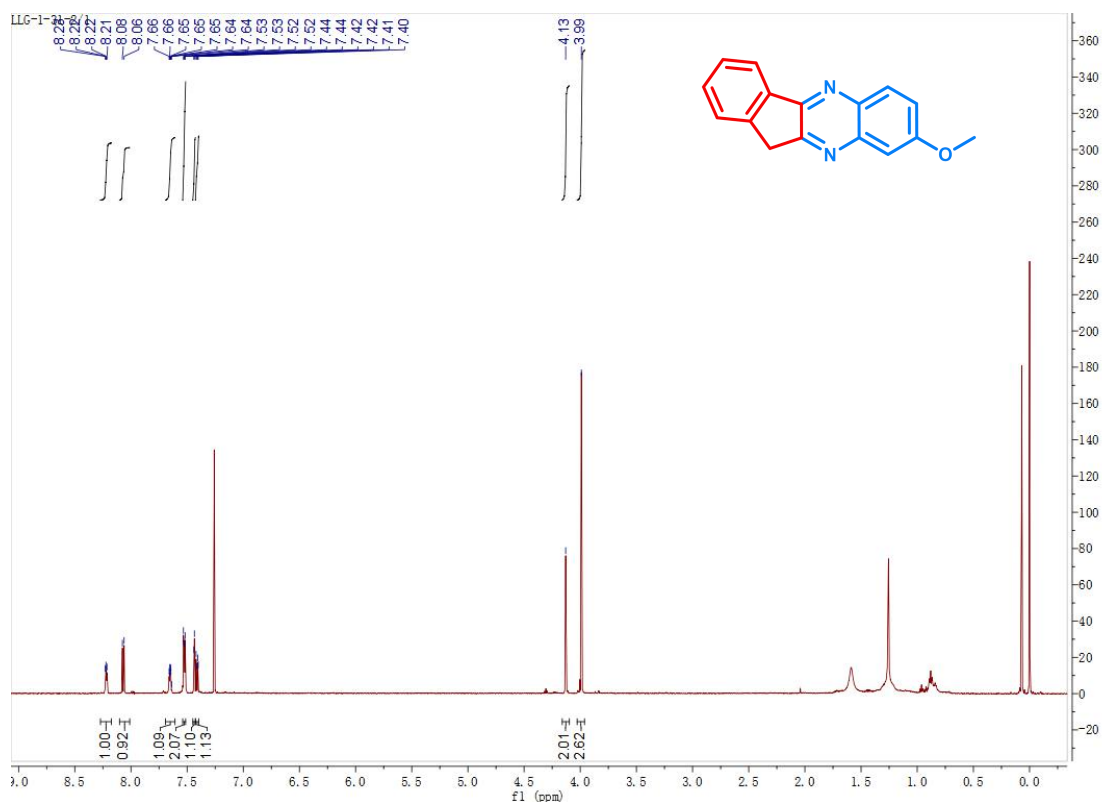

Figure S7. <sup>1</sup>H NMR spectrum of compound 2.3ac-2.

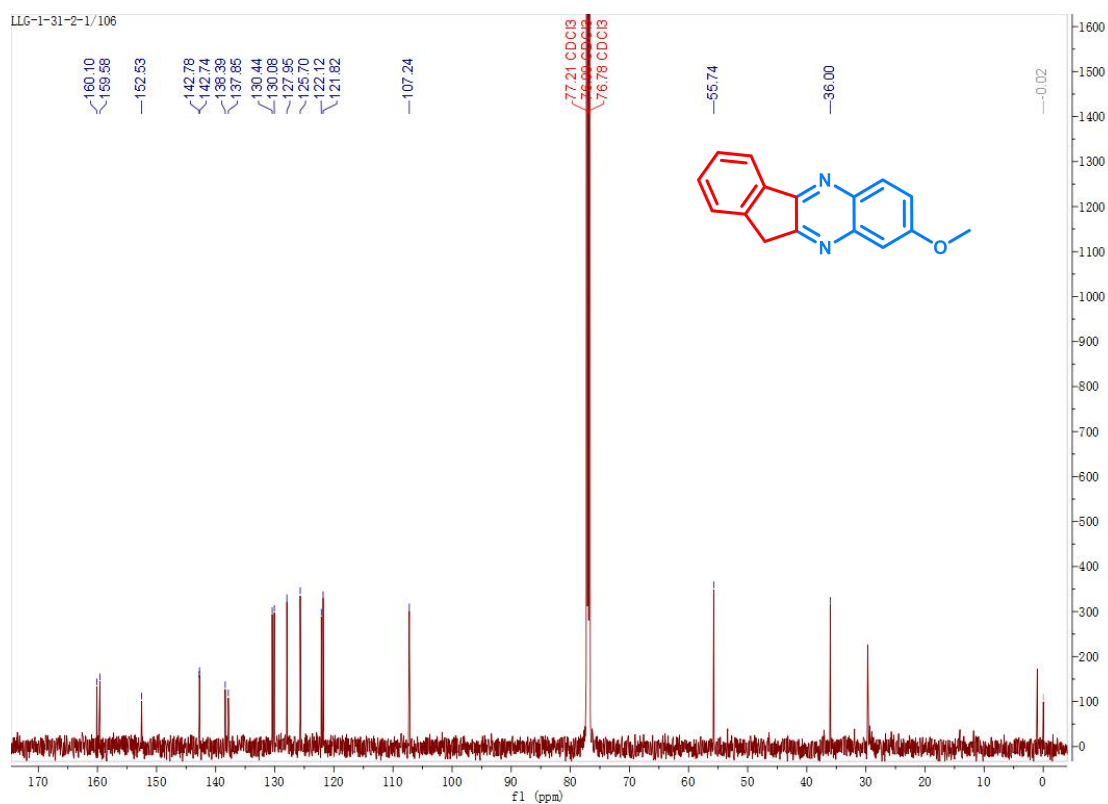

Figure S8. <sup>13</sup>C NMR spectrum of compound 2.3ac-2.

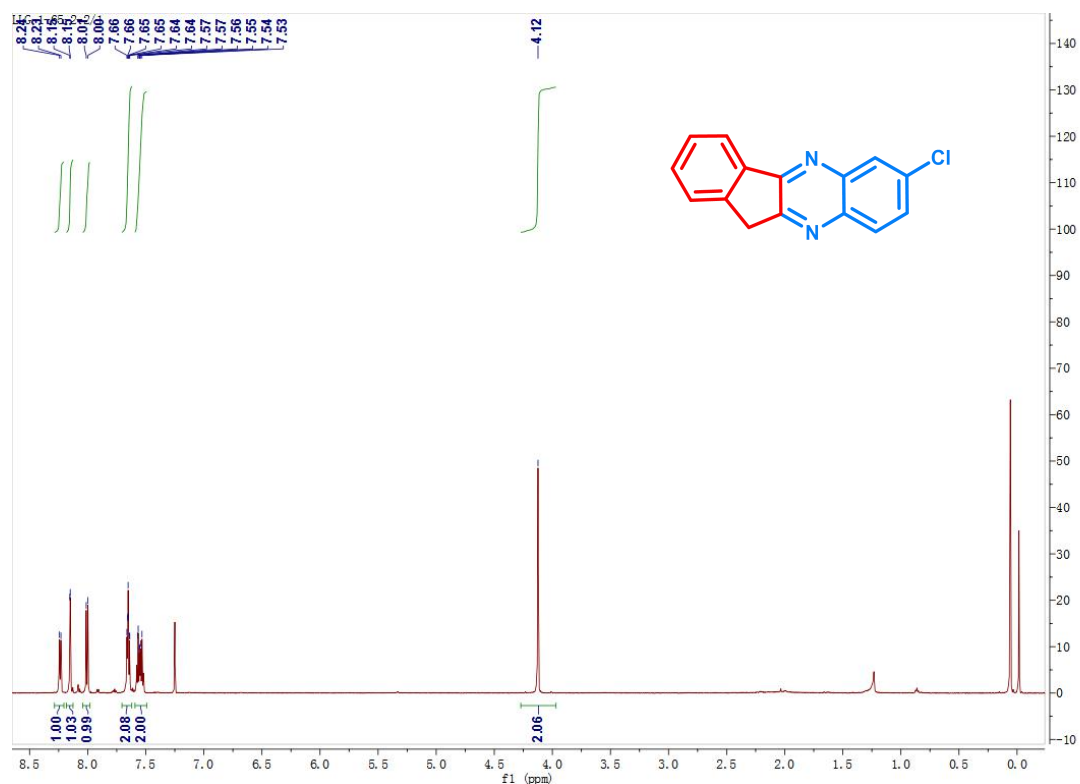

Figure S9. <sup>1</sup>H NMR spectrum of compound 2.3ad-1.

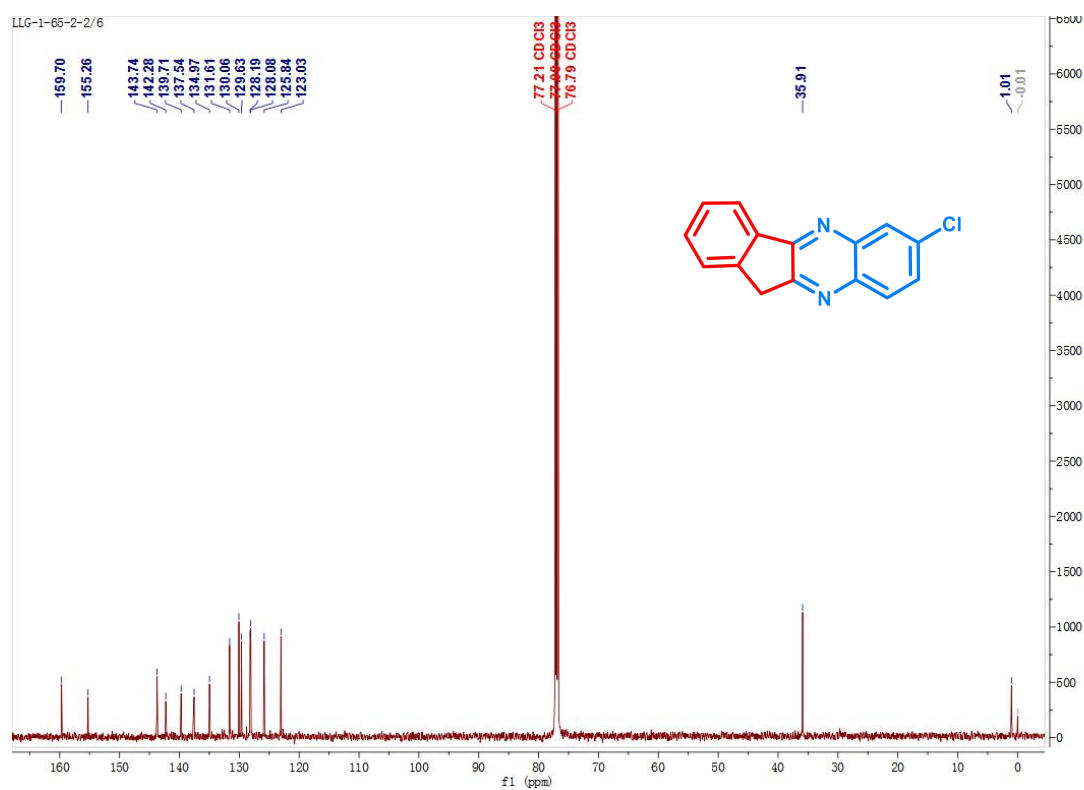

Figure S10. <sup>13</sup>C NMR spectrum of compound 2.3ad-1.

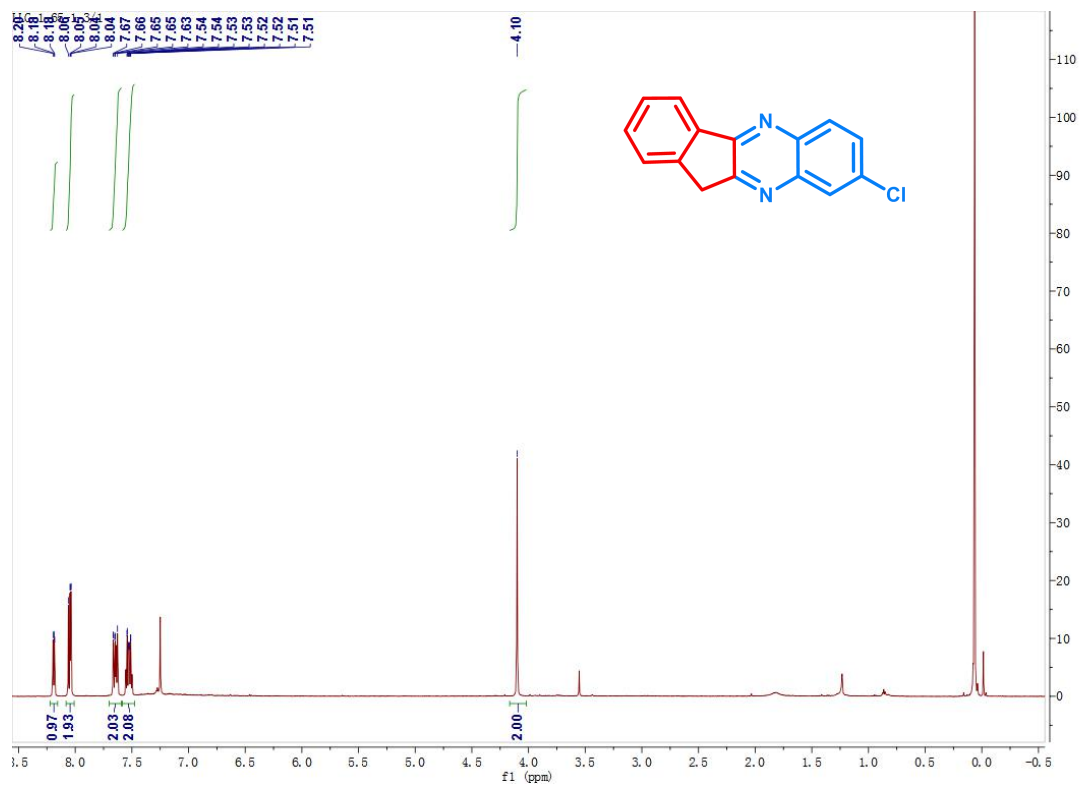

**Figure S11.  $^1\text{H}$  NMR spectrum of compound 2.3ad-2.**

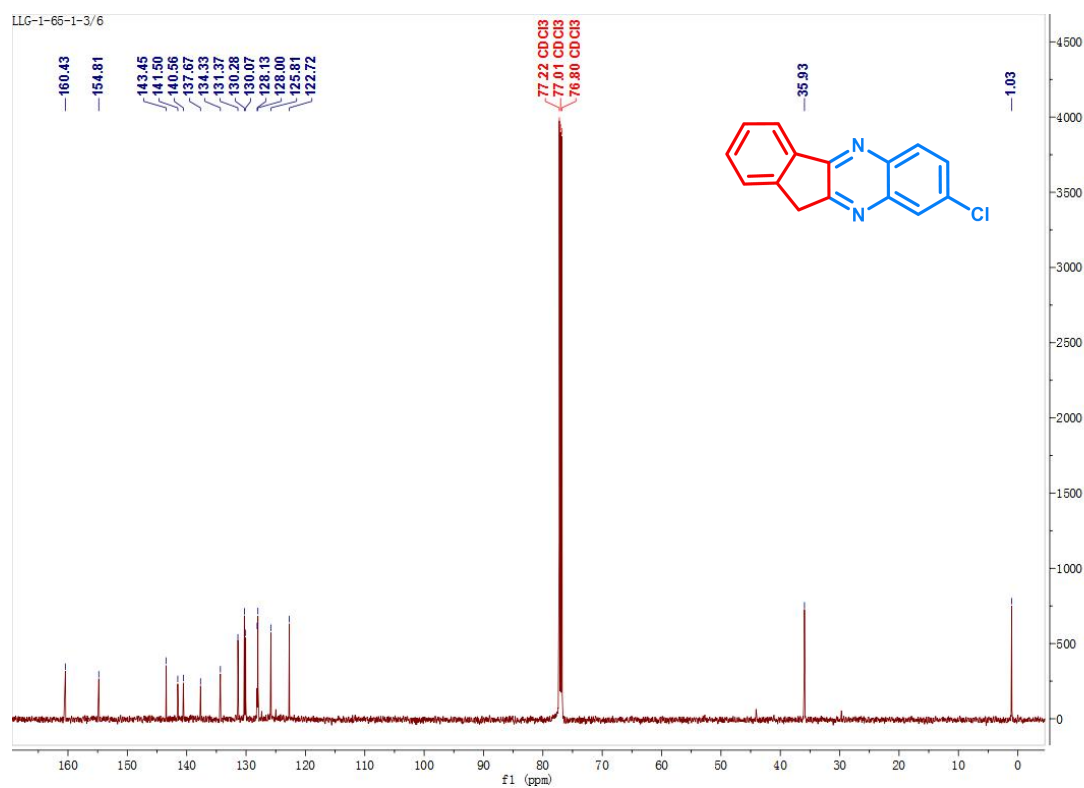

**Figure S12.  $^{13}\text{C}$  NMR spectrum of compound 2.3ad-2.**

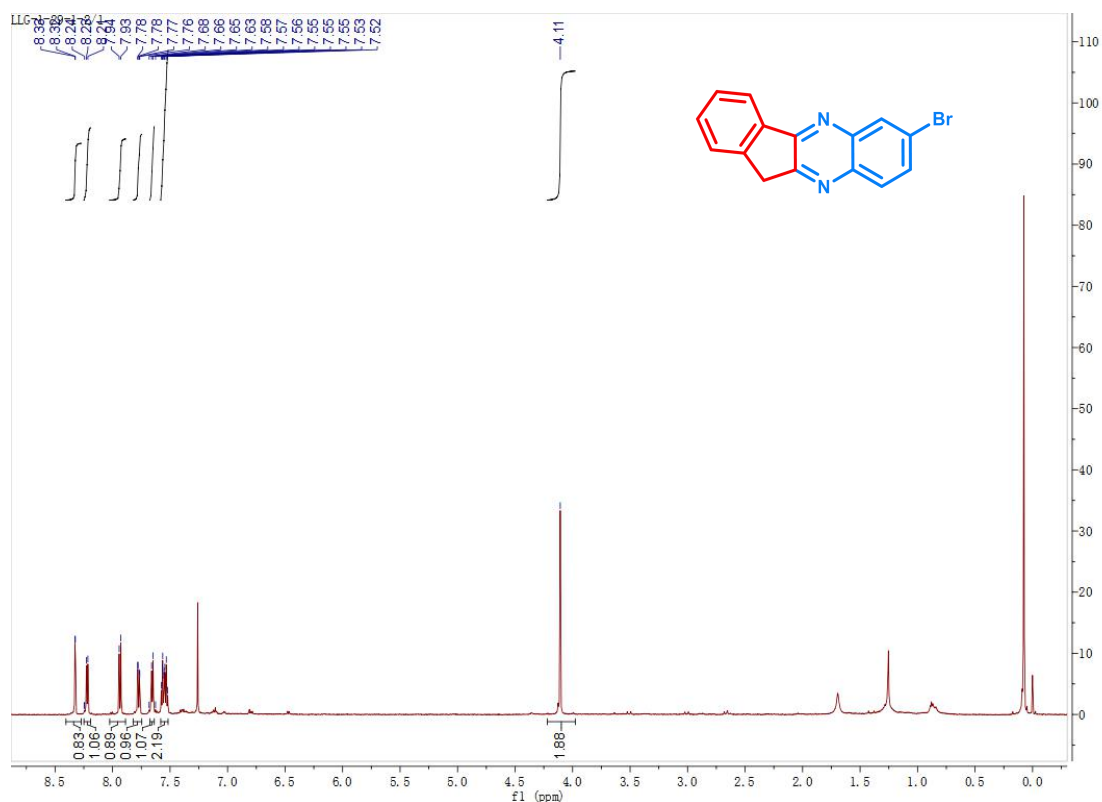

Figure S13.  $^1\text{H}$  NMR spectrum of compound 2.3ae-1.

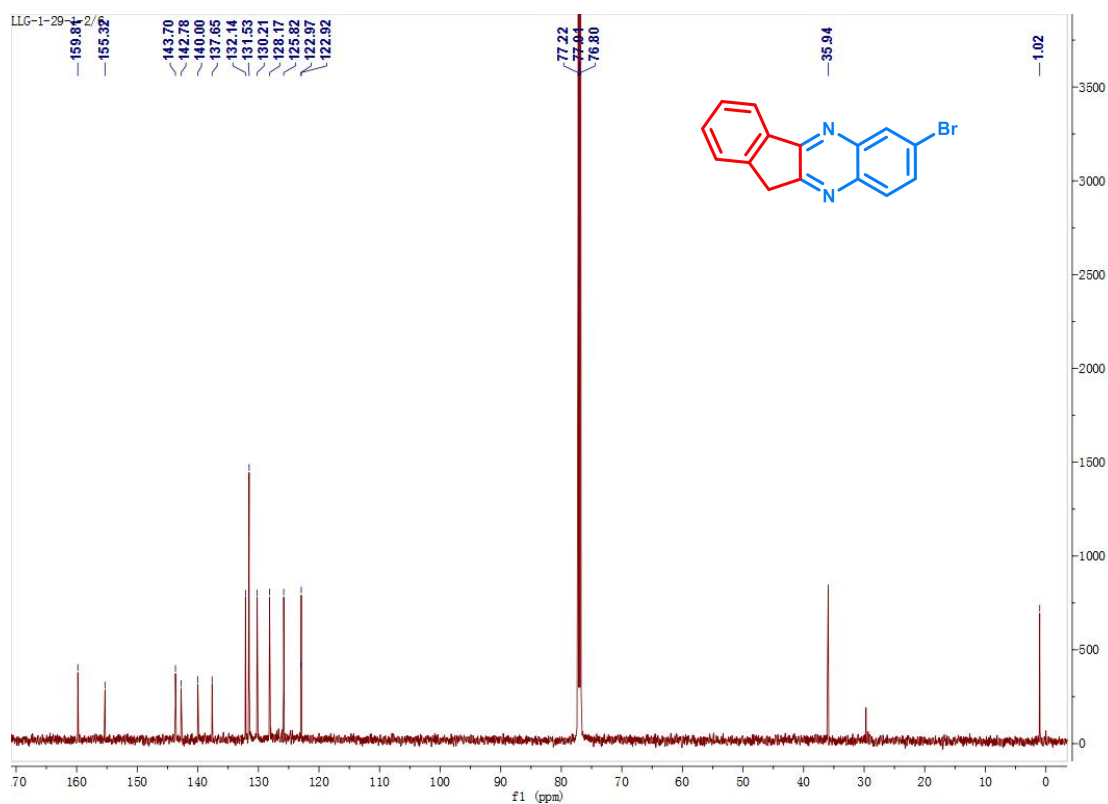

Figure S14.  $^{13}\text{C}$  NMR spectrum of compound 2.3ae-1.



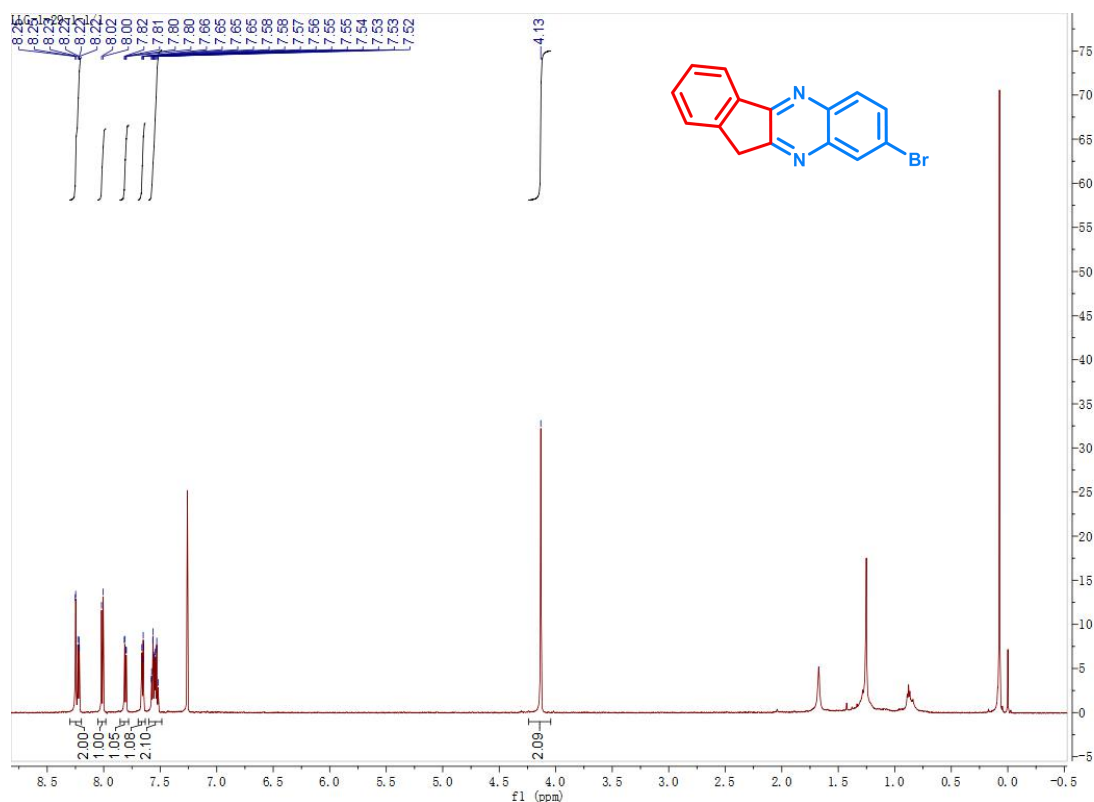

**Figure S15.  $^1\text{H}$  NMR spectrum of compound 2.3ae-2.**

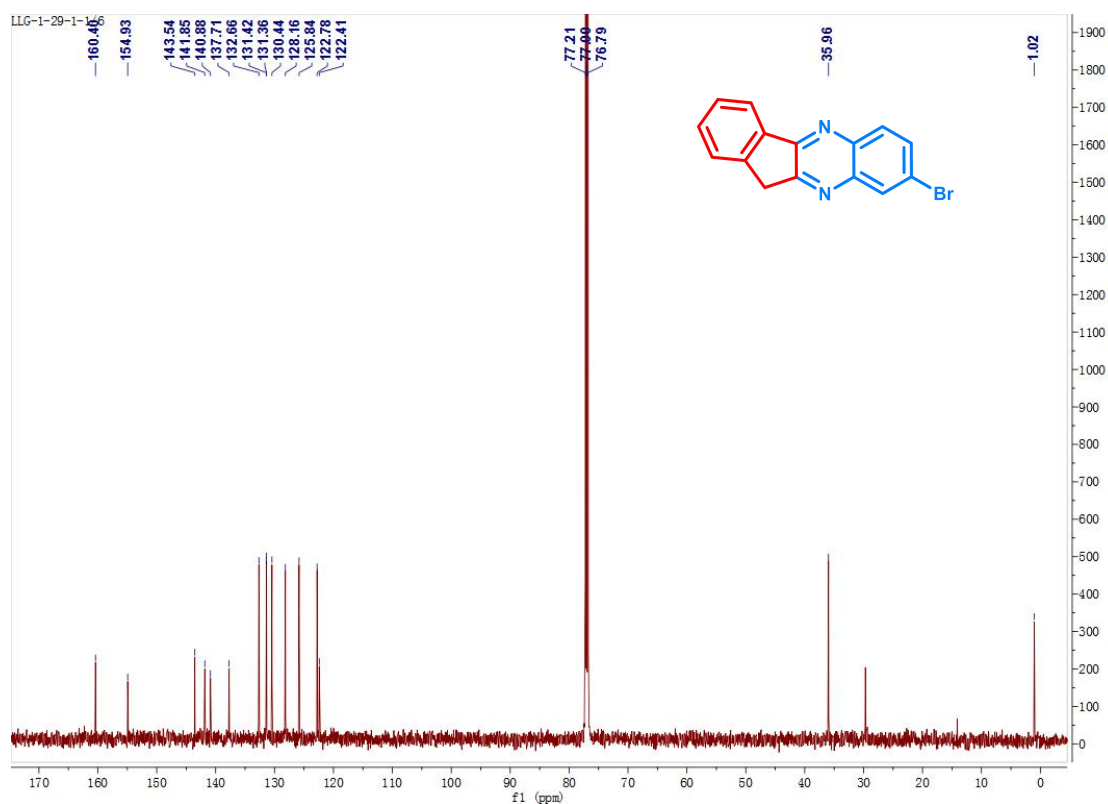

**Figure S16.  $^{13}\text{C}$  NMR spectrum of compound 2.3ae-2.**

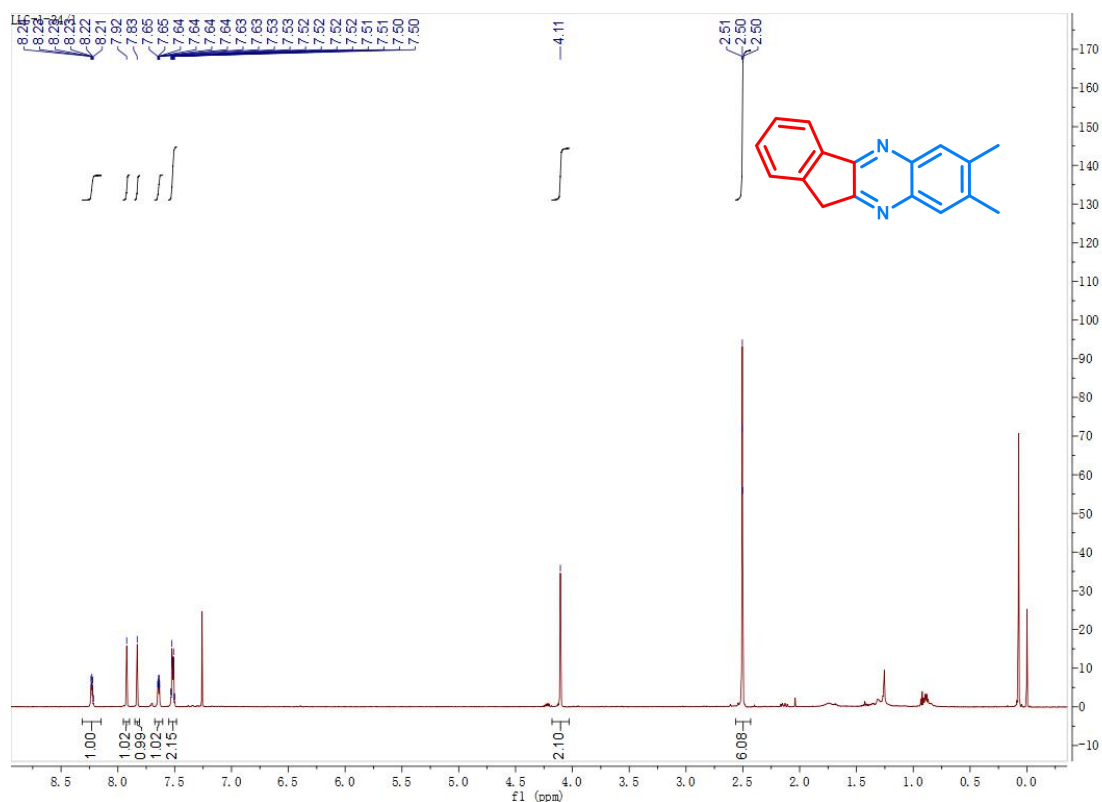

**Figure S17.**  $^1\text{H}$  NMR spectrum of compound **2.3af**.

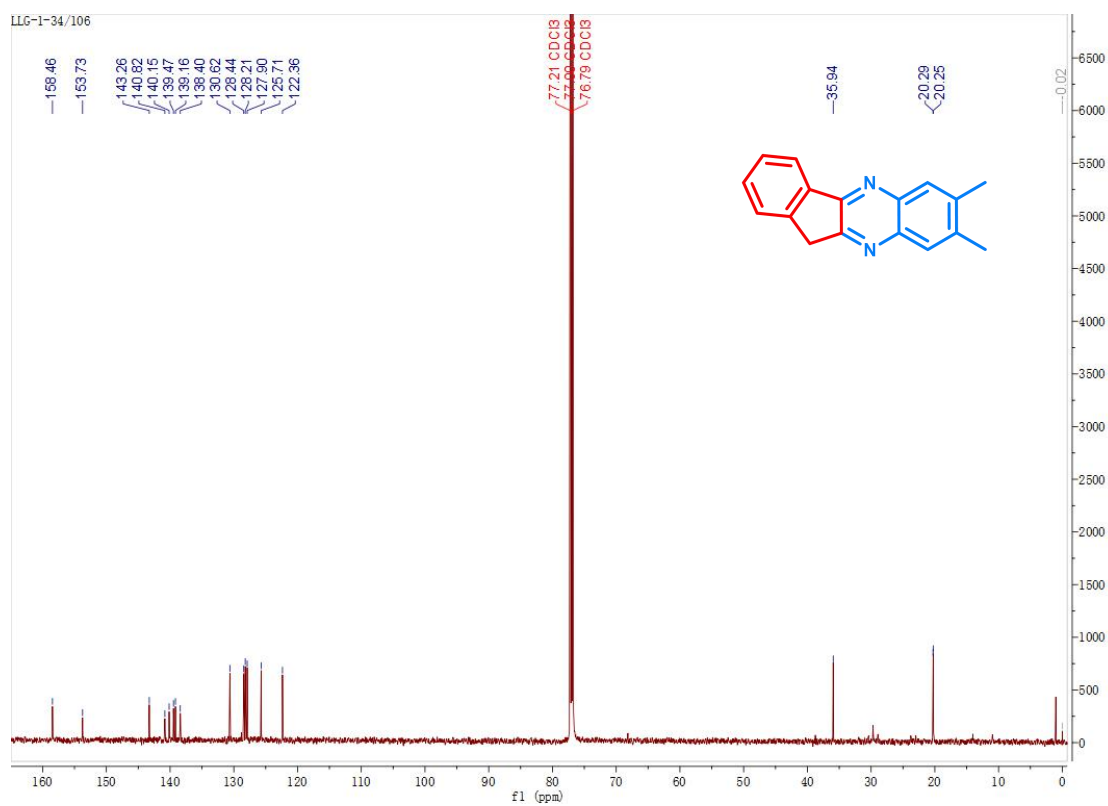

**Figure S18.**  $^{13}\text{C}$  NMR spectrum of compound **2.3af**.

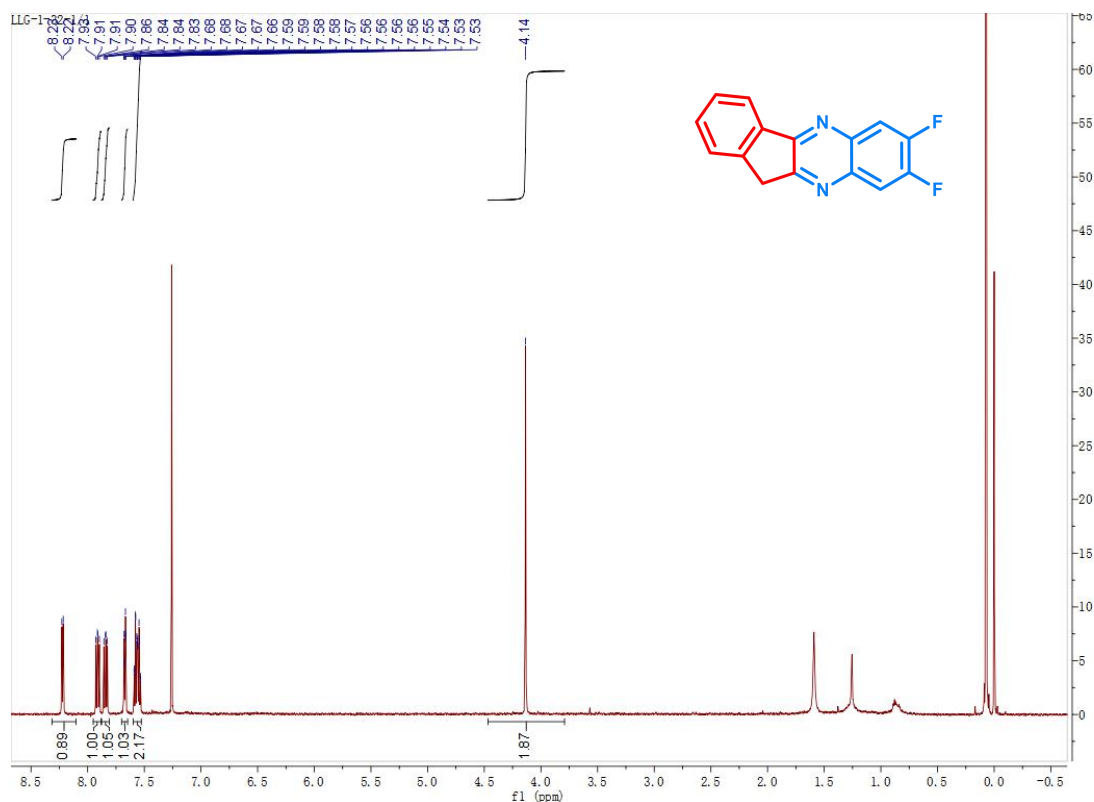

Figure S19. <sup>1</sup>H NMR spectrum of compound 2.3ag.

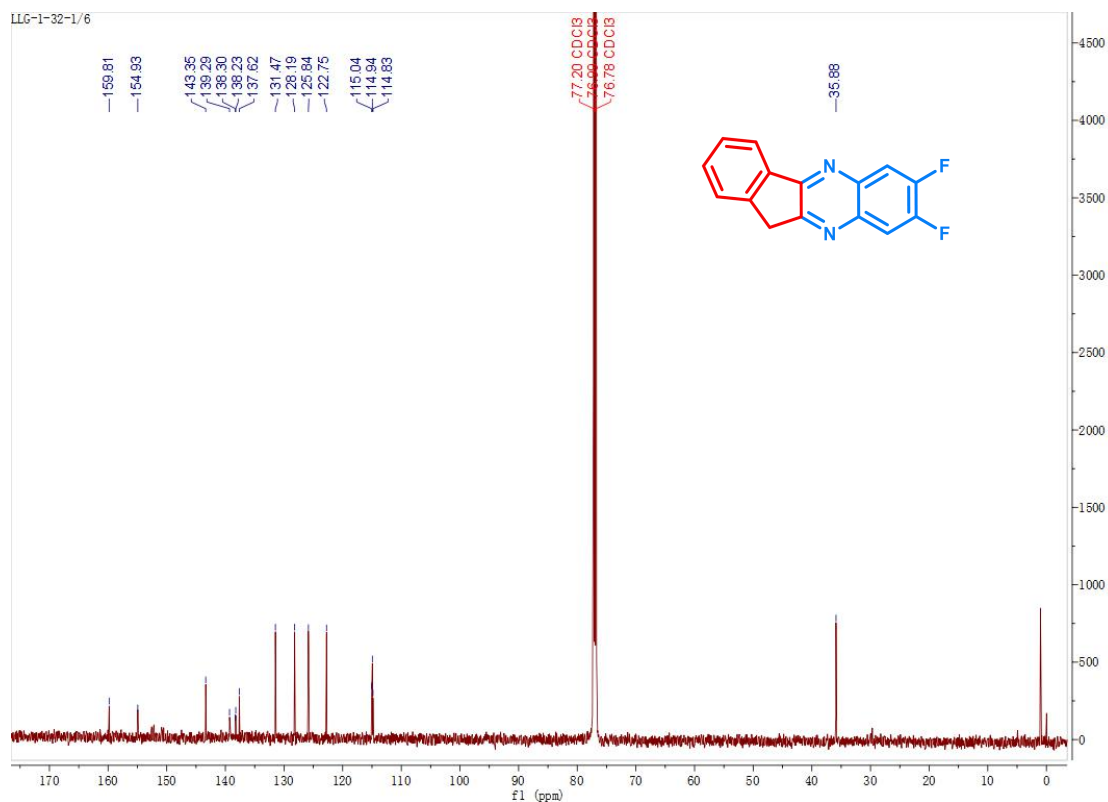

Figure S20. <sup>13</sup>C NMR spectrum of compound 2.3ag.

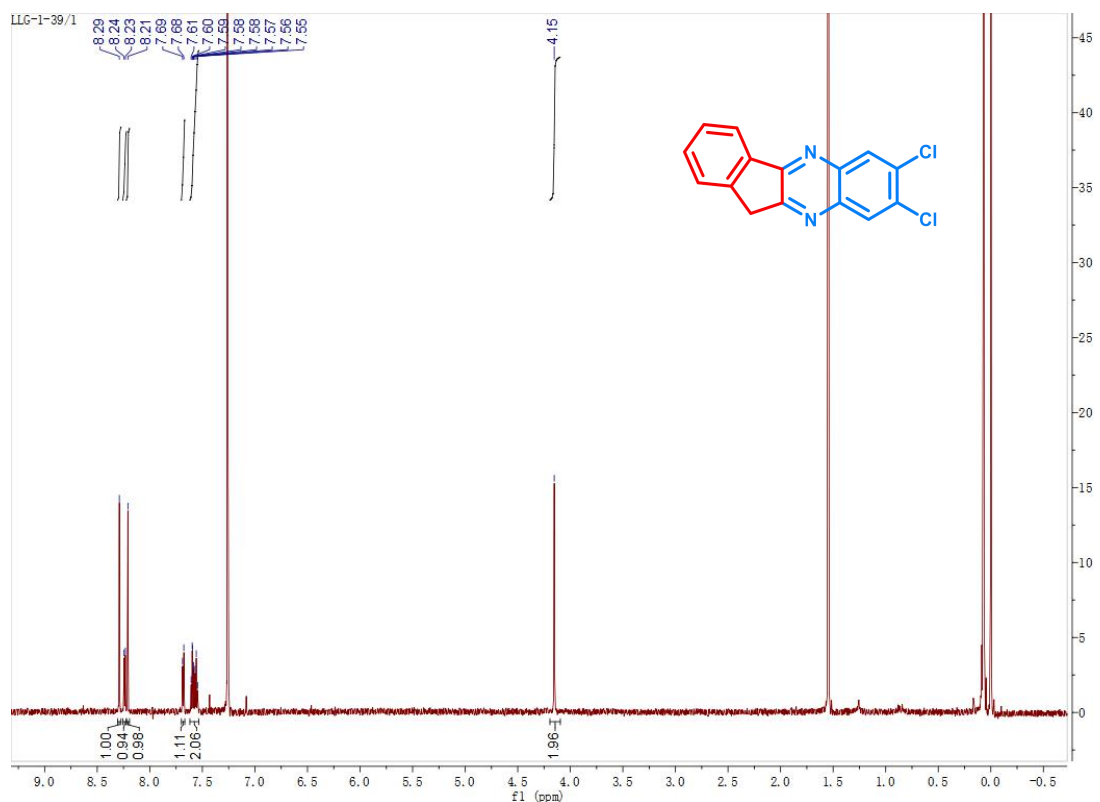

Figure S21.  $^1\text{H}$  NMR spectrum of compound 2.3ah.

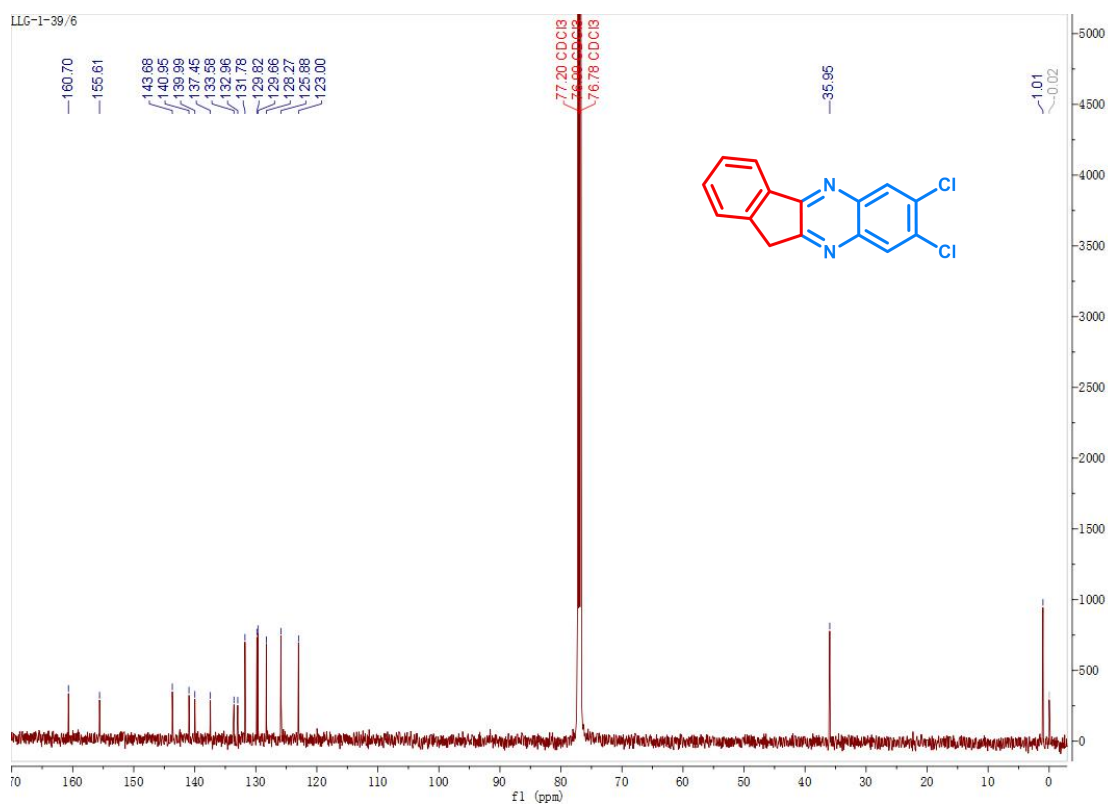

Figure S22.  $^{13}\text{C}$  NMR spectrum of compound 2.3ah.

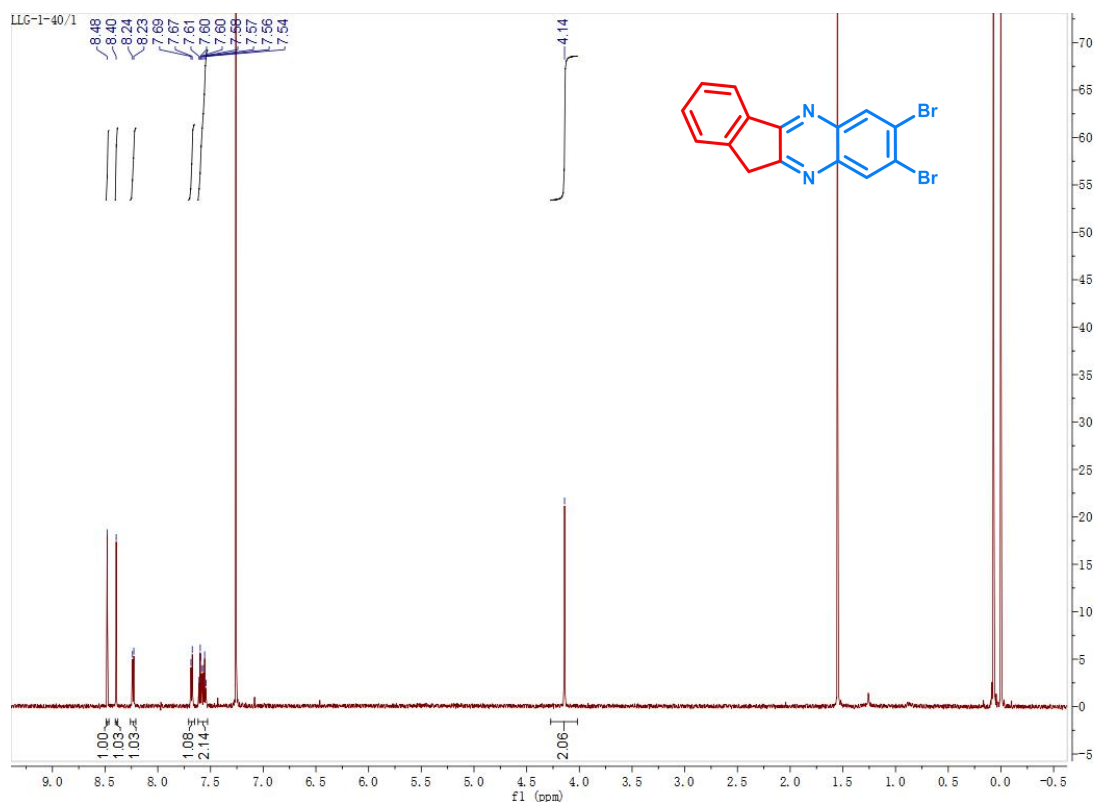

Figure S23. <sup>1</sup>H NMR spectrum of compound **2.3ai**.

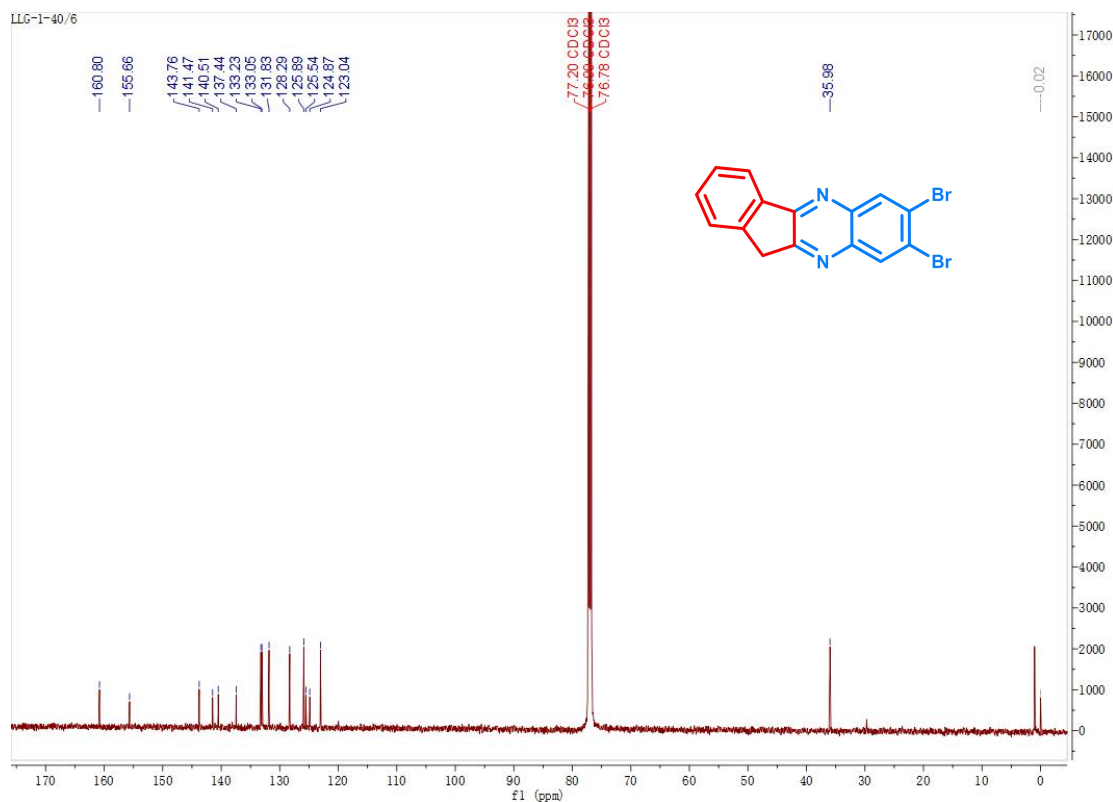

Figure S24. <sup>13</sup>C NMR spectrum of compound **2.3ai**.

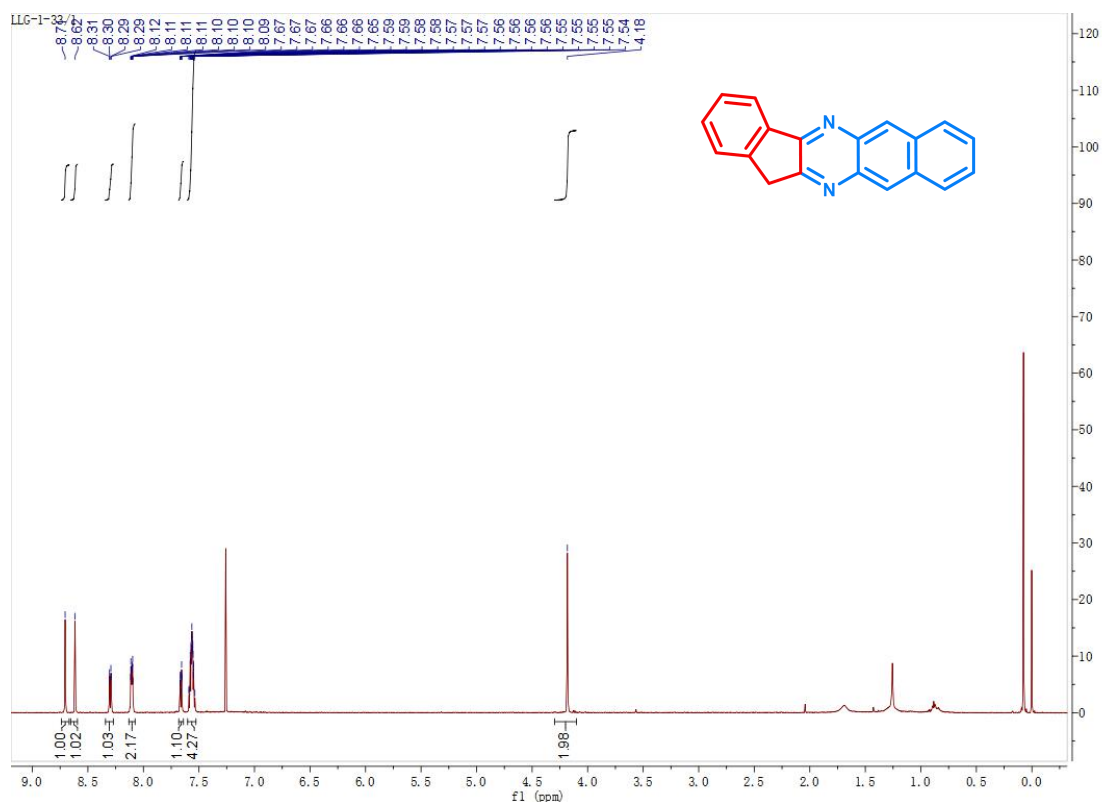

Figure S25. <sup>1</sup>H NMR spectrum of compound 2.3aj.

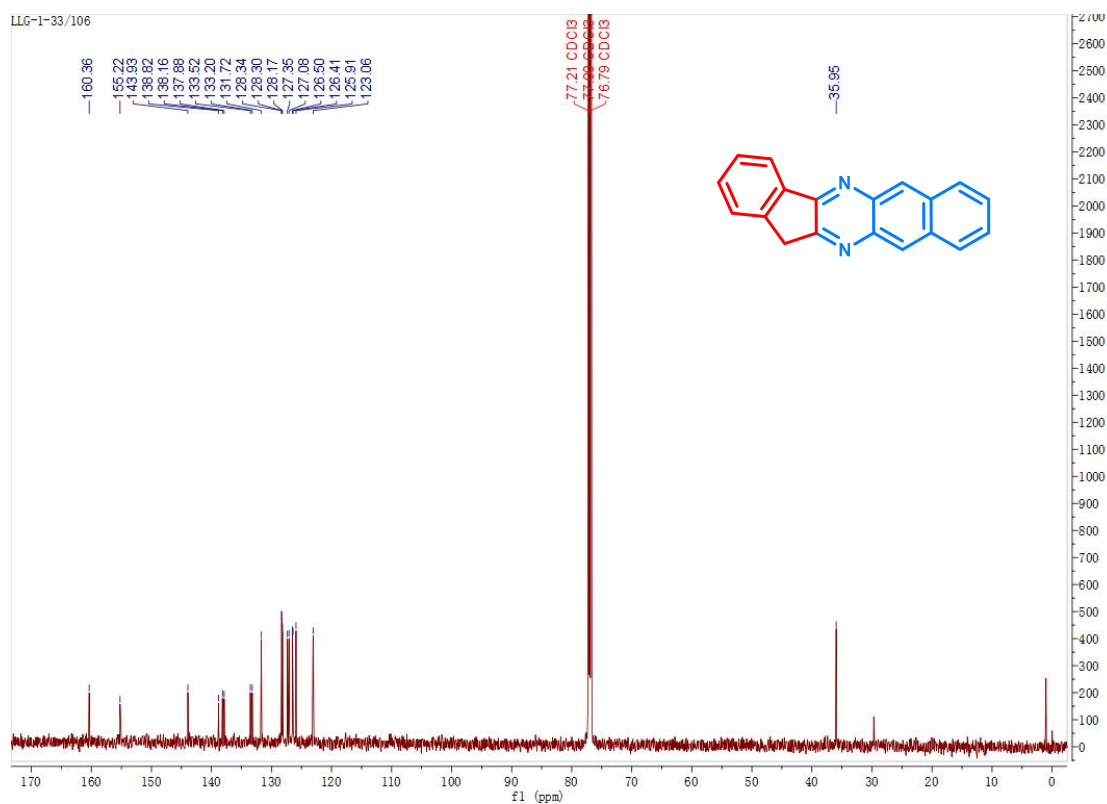

Figure S26. <sup>13</sup>C NMR spectrum of compound 2.3aj.

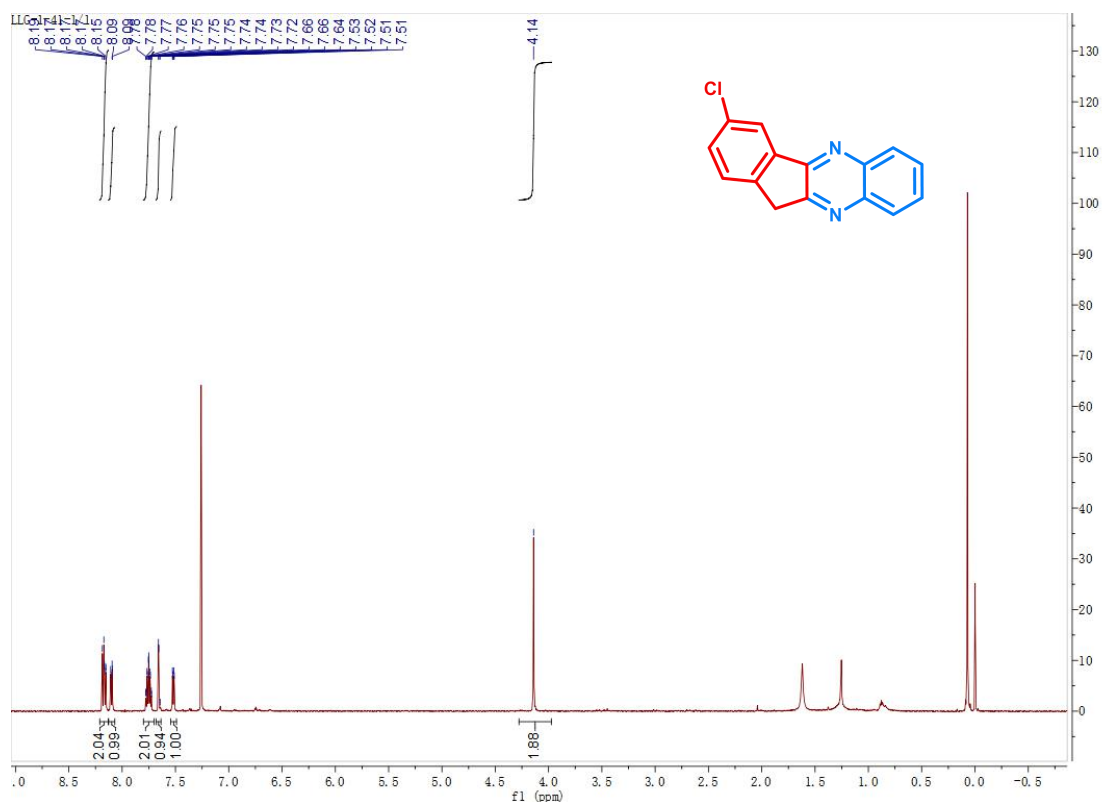

Figure S27. <sup>1</sup>H NMR spectrum of compound 2.3ba-1.

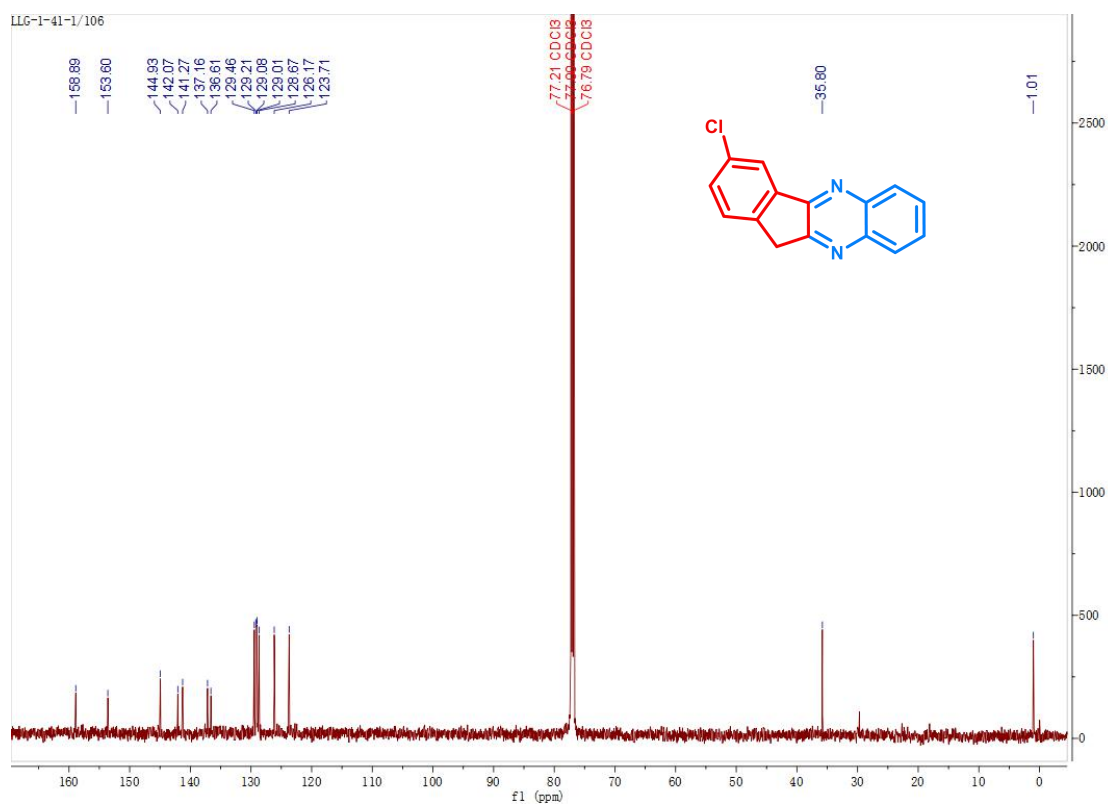

Figure S28. <sup>13</sup>C NMR spectrum of compound 2.3ba-1.

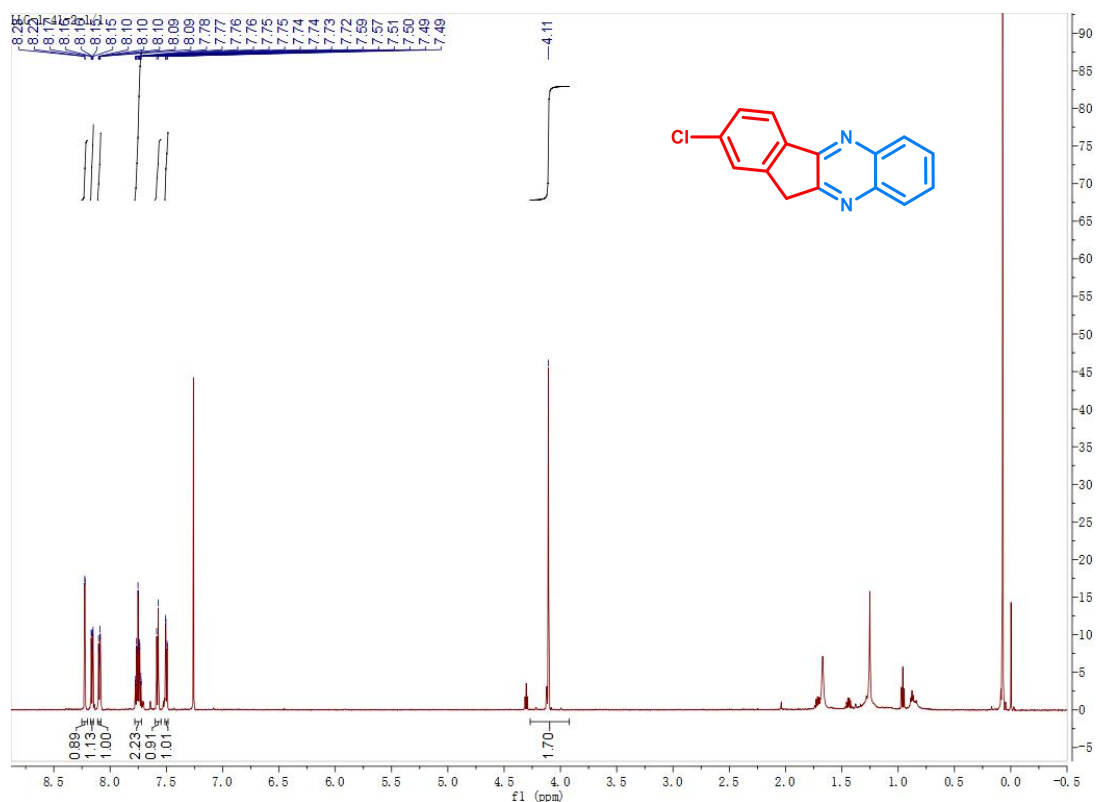

Figure S29. <sup>1</sup>H NMR spectrum of compound 2.3ba-2.

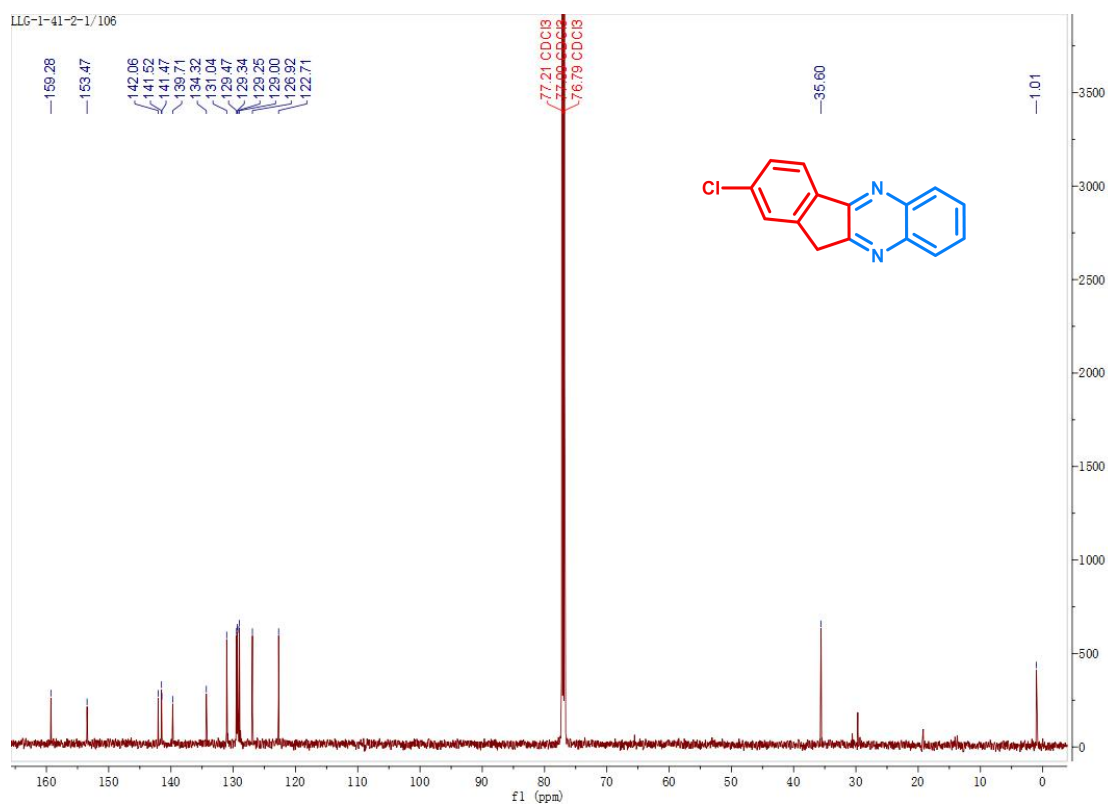

Figure S30. <sup>13</sup>C NMR spectrum of compound 2.3ba-2.



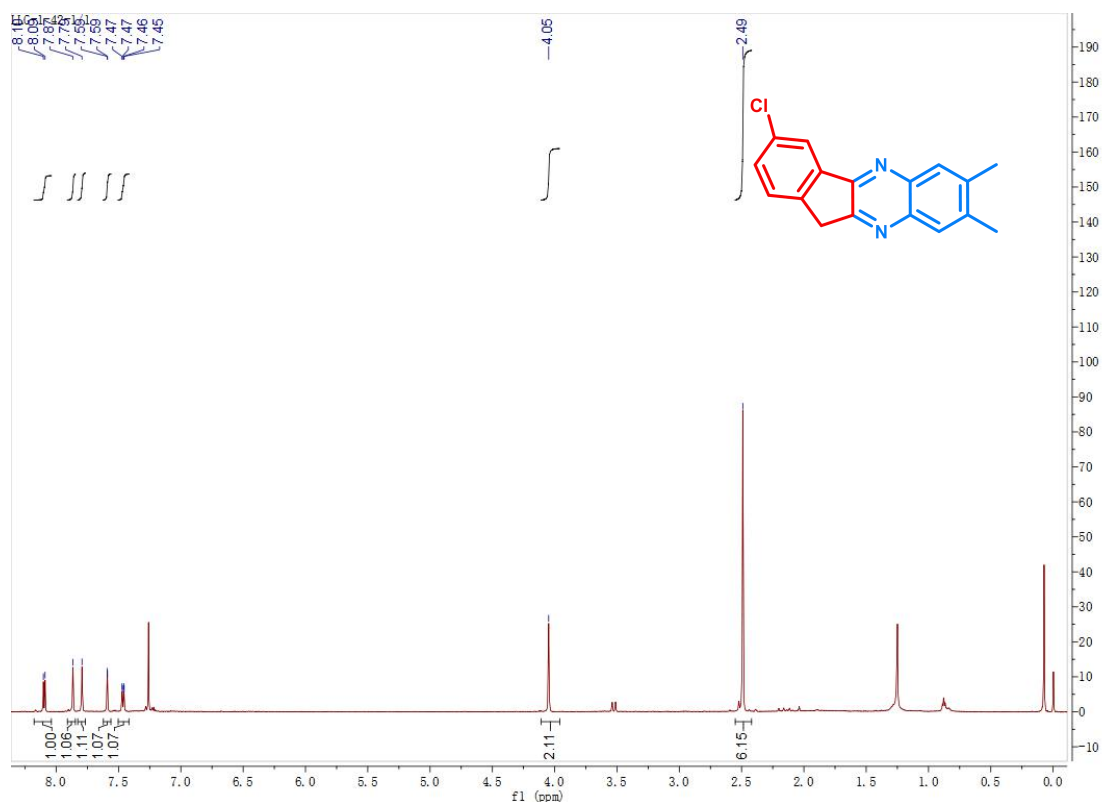

Figure S31. <sup>1</sup>H NMR spectrum of compound 2.3bb-1.

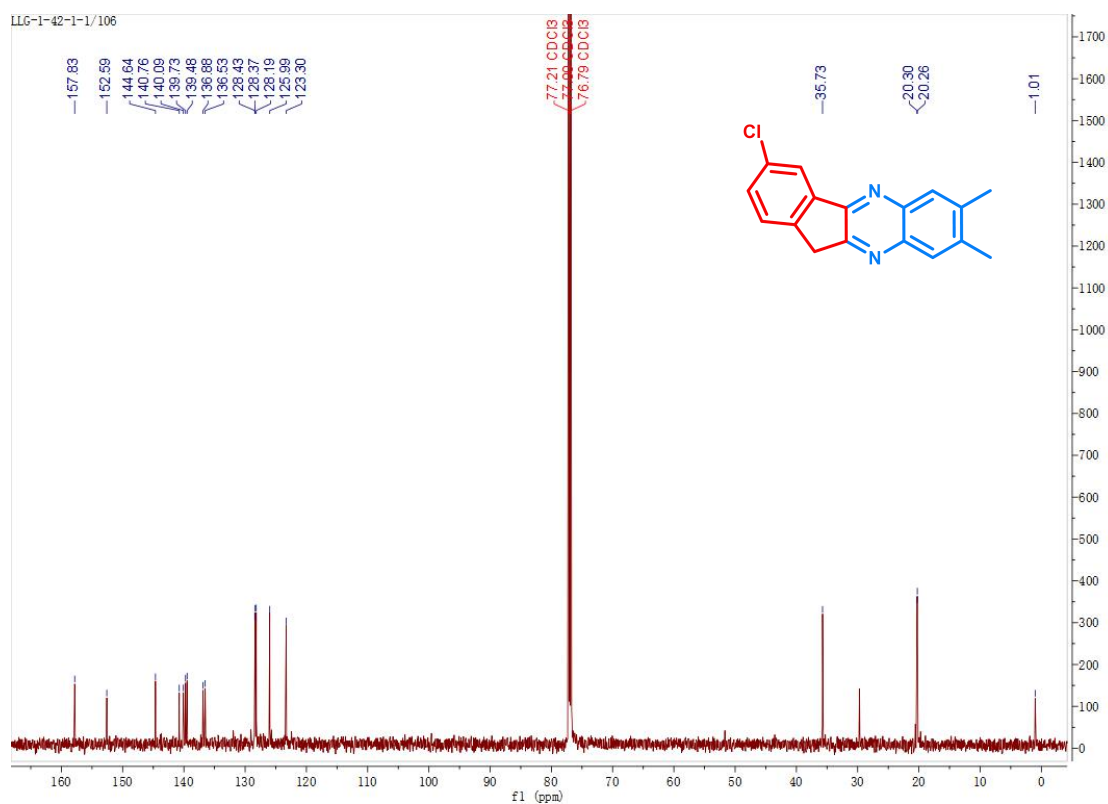

Figure S32. <sup>13</sup>C NMR spectrum of compound 2.3bb-1.

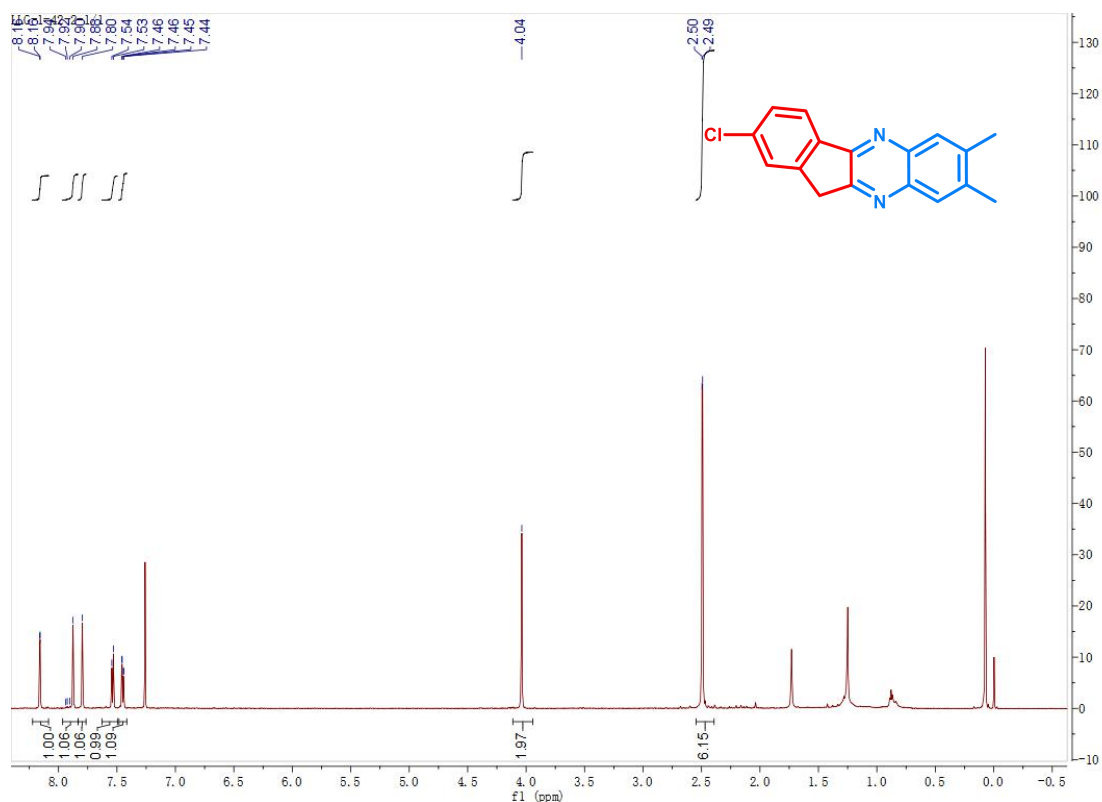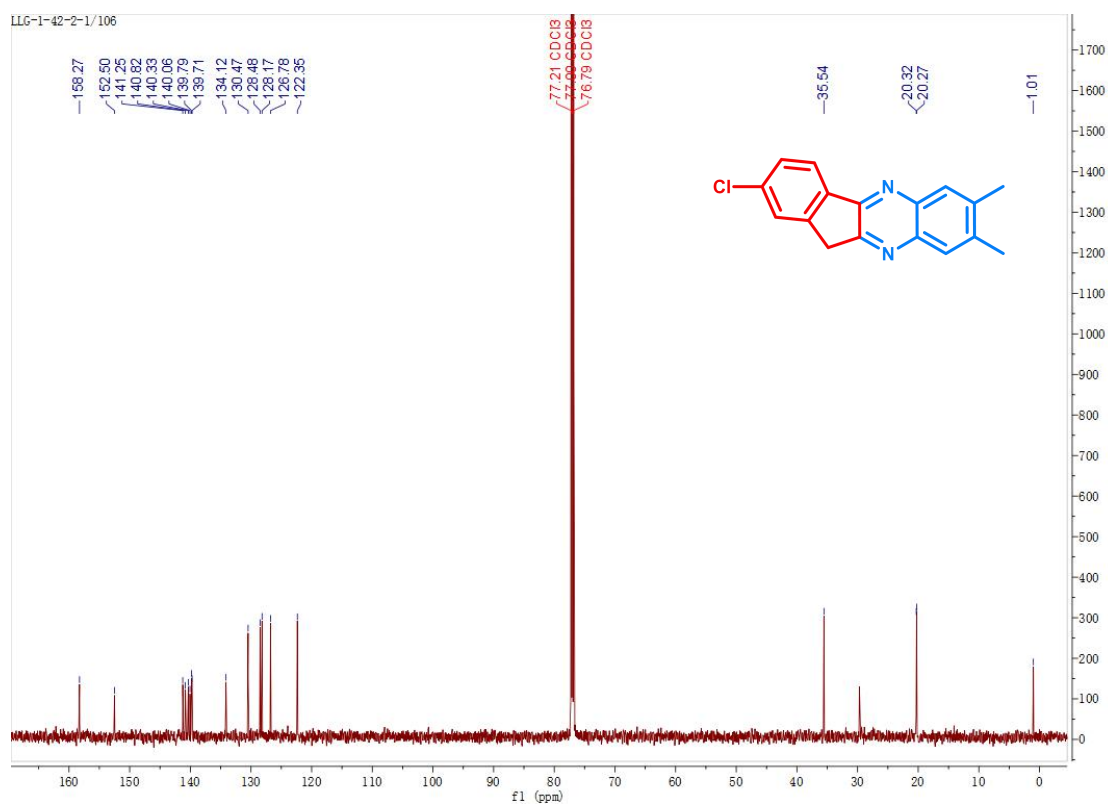

## Mass Spectrum SmartFormula Report

### Analysis Info

Analysis Name D:\Data\USER-2021\LLG-1-29.d  
 Method tune\_low\_NEW.m  
 Sample Name LLG-1-29  
 Comment

Acquisition Date 8/27/2021 2:38:12 PM

Operator Ma  
 Instrument / Ser# micrOTOF-Q II 10203

### Acquisition Parameter

|             |            |                       |           |                  |           |
|-------------|------------|-----------------------|-----------|------------------|-----------|
| Source Type | ESI        | Ion Polarity          | Positive  | Set Nebulizer    | 0.8 Bar   |
| Focus       | Not active | Set Capillary         | 4500 V    | Set Dry Heater   | 180 °C    |
| Scan Begin  | 50 m/z     | Set End Plate Offset  | -500 V    | Set Dry Gas      | 6.0 l/min |
| Scan End    | 1200 m/z   | Set Collision Cell RF | 150.0 Vpp | Set Divert Valve | Source    |

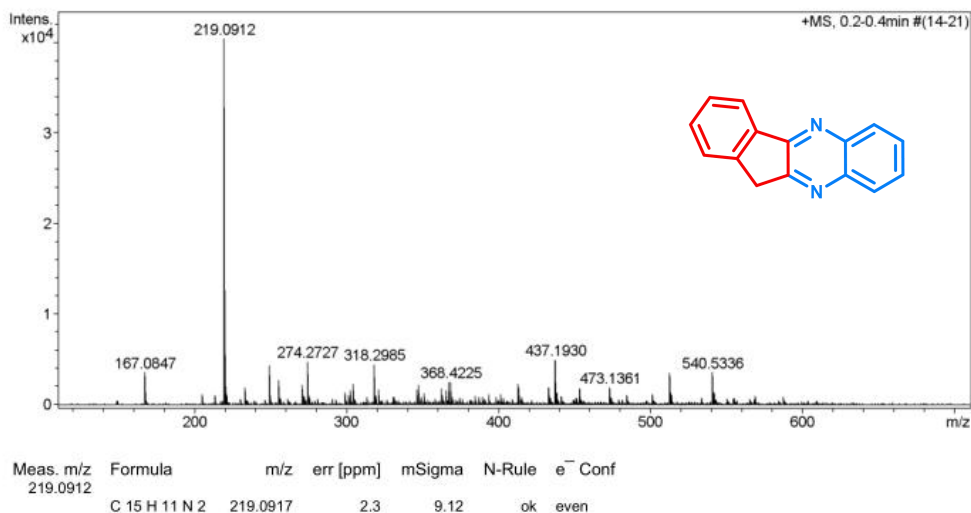

Figure S35. Mass spectrum smartFormula report of compound 2.3aa.

## Mass Spectrum SmartFormula Report

### Analysis Info

Analysis Name D:\Data\USER-2021\LLG-1-28.d  
 Method tune\_low\_NEW.m  
 Sample Name LLG-1-28  
 Comment

Acquisition Date 6/25/2021 2:19:37 PM

Operator Ma  
 Instrument / Ser# micrOTOF-Q II 10203

### Acquisition Parameter

|             |            |                       |           |                  |           |
|-------------|------------|-----------------------|-----------|------------------|-----------|
| Source Type | ESI        | Ion Polarity          | Positive  | Set Nebulizer    | 0.8 Bar   |
| Focus       | Not active | Set Capillary         | 4500 V    | Set Dry Heater   | 180 °C    |
| Scan Begin  | 50 m/z     | Set End Plate Offset  | -500 V    | Set Dry Gas      | 6.0 l/min |
| Scan End    | 1200 m/z   | Set Collision Cell RF | 150.0 Vpp | Set Divert Valve | Source    |

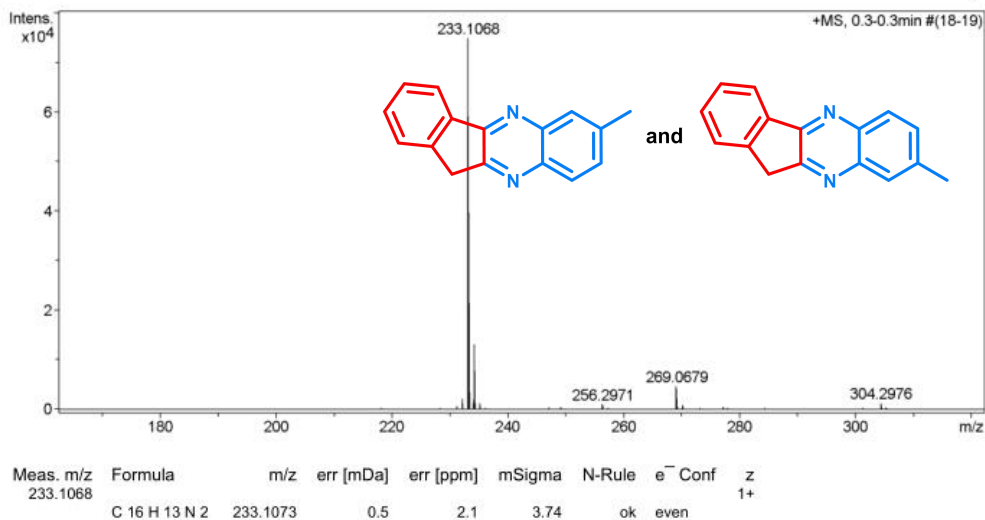

Figure S36. Mass spectrum smartFormula report of compounds 2.3ab-1 and 2.3ab-2.

## Mass Spectrum SmartFormula Report

### Analysis Info

Analysis Name D:\Data\USER-2021\LLG-1-31-1.d  
 Method tune\_low\_NEW.m  
 Sample Name LLG-1-31-1  
 Comment

Acquisition Date 6/25/2021 2:25:06 PM

Operator Ma  
 Instrument / Ser# micrOTOF-Q II 10203

### Acquisition Parameter

|             |            |                       |           |                  |           |
|-------------|------------|-----------------------|-----------|------------------|-----------|
| Source Type | ESI        | Ion Polarity          | Positive  | Set Nebulizer    | 0.8 Bar   |
| Focus       | Not active | Set Capillary         | 4500 V    | Set Dry Heater   | 180 °C    |
| Scan Begin  | 50 m/z     | Set End Plate Offset  | -500 V    | Set Dry Gas      | 6.0 l/min |
| Scan End    | 1200 m/z   | Set Collision Cell RF | 150.0 Vpp | Set Divert Valve | Source    |

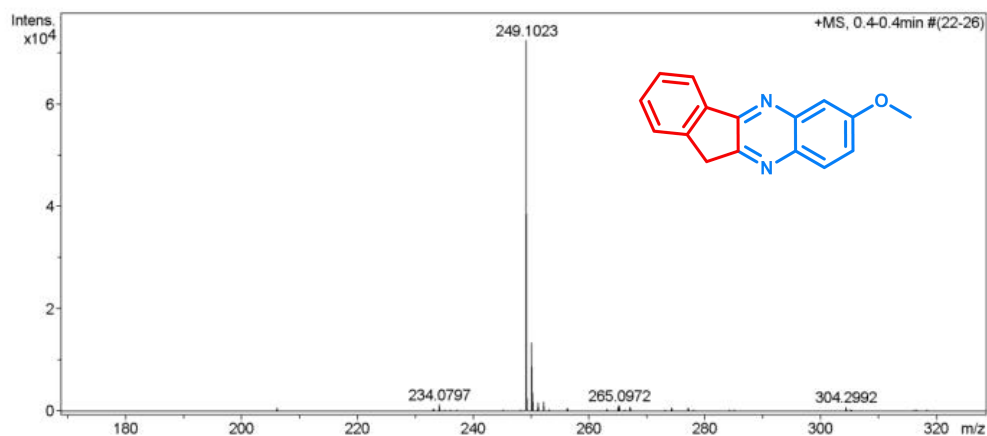

| Meas. m/z | Formula         | m/z      | err [mDa] | err [ppm] | mSigma | N-Rule | e <sup>-</sup> Conf | z  |
|-----------|-----------------|----------|-----------|-----------|--------|--------|---------------------|----|
| 249.1023  | C 16 H 13 N 2 O | 249.1022 | -0.0      | -0.1      | 6.00   | ok     | even                | 1+ |

Figure S37. Mass spectrum smartFormula report of compound 2.3ac-1.

## Mass Spectrum SmartFormula Report

### Analysis Info

Analysis Name D:\Data\USER-2021\LLG-1-31-2.d  
 Method tune\_low\_NEW.m  
 Sample Name LLG-1-31-2  
 Comment

Acquisition Date 6/25/2021 2:26:59 PM

Operator Ma  
 Instrument / Ser# micrOTOF-Q II 10203

### Acquisition Parameter

|             |            |                       |           |                  |           |
|-------------|------------|-----------------------|-----------|------------------|-----------|
| Source Type | ESI        | Ion Polarity          | Positive  | Set Nebulizer    | 0.8 Bar   |
| Focus       | Not active | Set Capillary         | 4500 V    | Set Dry Heater   | 180 °C    |
| Scan Begin  | 50 m/z     | Set End Plate Offset  | -500 V    | Set Dry Gas      | 6.0 l/min |
| Scan End    | 1200 m/z   | Set Collision Cell RF | 150.0 Vpp | Set Divert Valve | Source    |

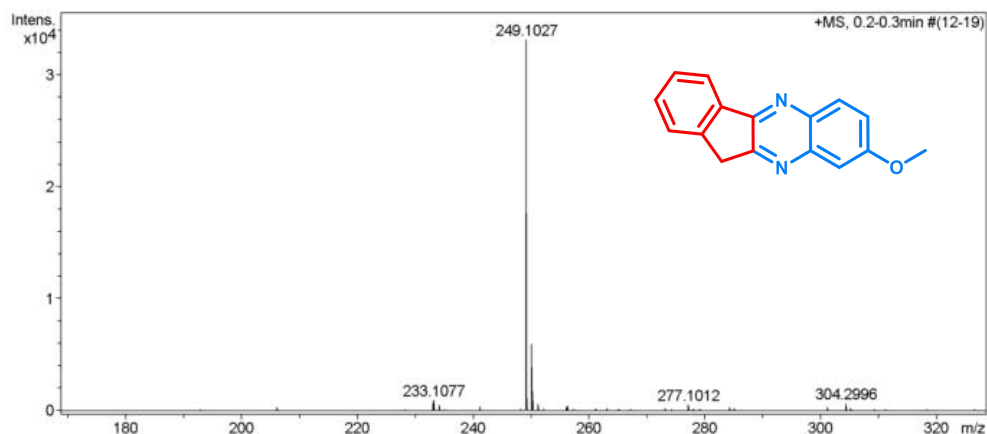

| Meas. m/z | Formula         | m/z      | err [mDa] | err [ppm] | mSigma | N-Rule | e <sup>-</sup> Conf | z  |
|-----------|-----------------|----------|-----------|-----------|--------|--------|---------------------|----|
| 249.1027  | C 16 H 13 N 2 O | 249.1022 | -0.4      | -1.8      | 2.26   | ok     | even                | 1+ |

Figure S38. Mass spectrum smartFormula report of compound 2.3ac-2.

## Mass Spectrum SmartFormula Report

### Analysis Info

Analysis Name D:\data\USER-2021\LLG- 1-65-2-2.d  
 Method tune\_low\_NEW.m  
 Sample Name LLG- 1-65-2-2  
 Comment

Acquisition Date 12/3/2021 3:12:23 PM

Operator Ma  
 Instrument / Ser# microTOF-Q II 10203

### Acquisition Parameter

|             |            |                       |           |                  |           |
|-------------|------------|-----------------------|-----------|------------------|-----------|
| Source Type | ESI        | Ion Polarity          | Positive  | Set Nebulizer    | 0.8 Bar   |
| Focus       | Not active | Set Capillary         | 4500 V    | Set Dry Heater   | 180 °C    |
| Scan Begin  | 50 m/z     | Set End Plate Offset  | -500 V    | Set Dry Gas      | 6.0 l/min |
| Scan End    | 1200 m/z   | Set Collision Cell RF | 150.0 Vpp | Set Divert Valve | Source    |

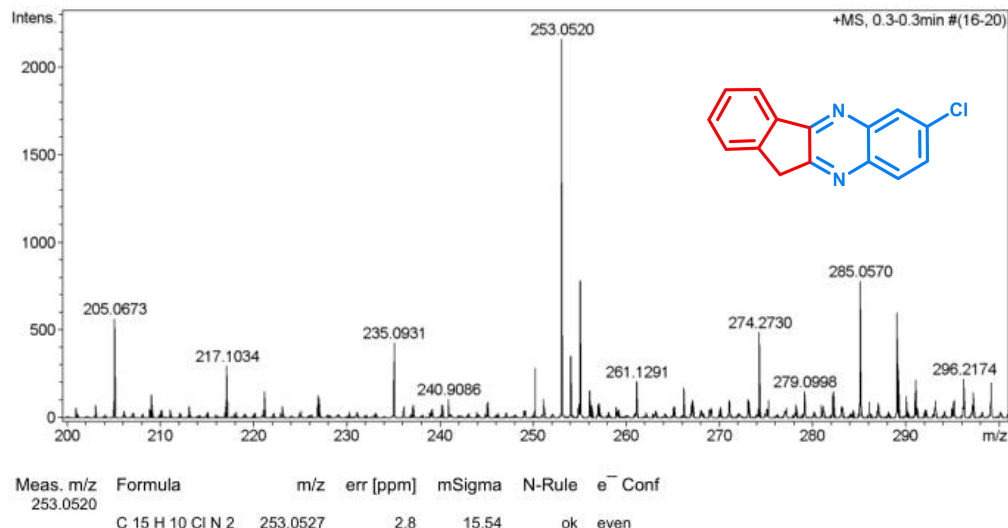

Figure S39. Mass spectrum smartFormula report of compound 2.3ad-1.

## Mass Spectrum SmartFormula Report

### Analysis Info

Analysis Name D:\data\USER-2021\LLG- 1-65-1-3.d  
 Method tune\_low\_NEW.m  
 Sample Name LLG- 1-65-1-3  
 Comment

Acquisition Date 12/3/2021 3:10:18 PM

Operator Ma  
 Instrument / Ser# microTOF-Q II 10203

### Acquisition Parameter

|             |            |                       |           |                  |           |
|-------------|------------|-----------------------|-----------|------------------|-----------|
| Source Type | ESI        | Ion Polarity          | Positive  | Set Nebulizer    | 0.8 Bar   |
| Focus       | Not active | Set Capillary         | 4500 V    | Set Dry Heater   | 180 °C    |
| Scan Begin  | 50 m/z     | Set End Plate Offset  | -500 V    | Set Dry Gas      | 6.0 l/min |
| Scan End    | 1200 m/z   | Set Collision Cell RF | 150.0 Vpp | Set Divert Valve | Source    |

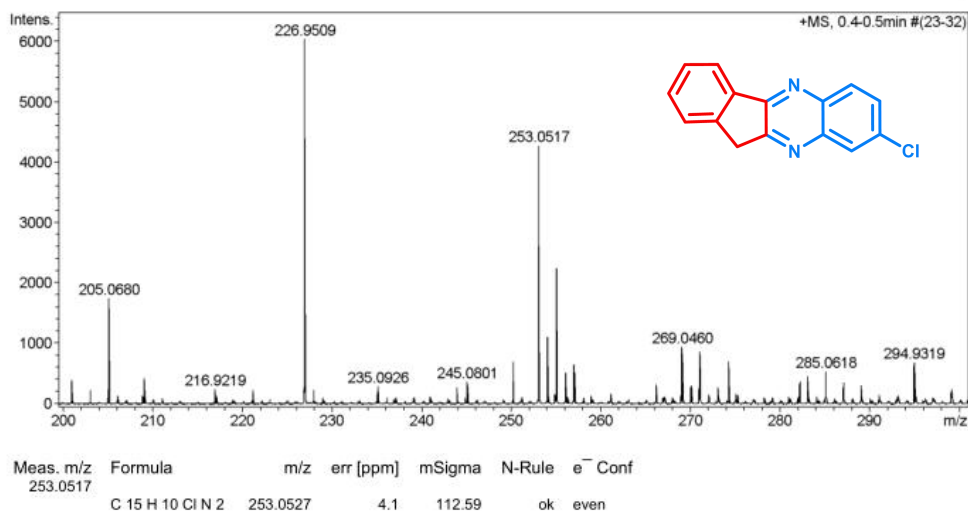

Figure S40. Mass spectrum smartFormula report of compound 2.3ad-2.

## Mass Spectrum SmartFormula Report

### Analysis Info

Analysis Name D:\Data\USER-2021\LLG-1-29-2.d  
Method tune\_low\_NEW.m  
Sample Name LLG-1-29-2  
Comment

Acquisition Date 6/25/2021 2:23:26 PM

Operator Ma  
Instrument / Ser# micrOTOF-Q II 10203

### Acquisition Parameter

|             |            |                       |           |                  |           |
|-------------|------------|-----------------------|-----------|------------------|-----------|
| Source Type | ESI        | Ion Polarity          | Positive  | Set Nebulizer    | 0.8 Bar   |
| Focus       | Not active | Set Capillary         | 4500 V    | Set Dry Heater   | 180 °C    |
| Scan Begin  | 50 m/z     | Set End Plate Offset  | -500 V    | Set Dry Gas      | 6.0 l/min |
| Scan End    | 1200 m/z   | Set Collision Cell RF | 150.0 Vpp | Set Divert Valve | Source    |

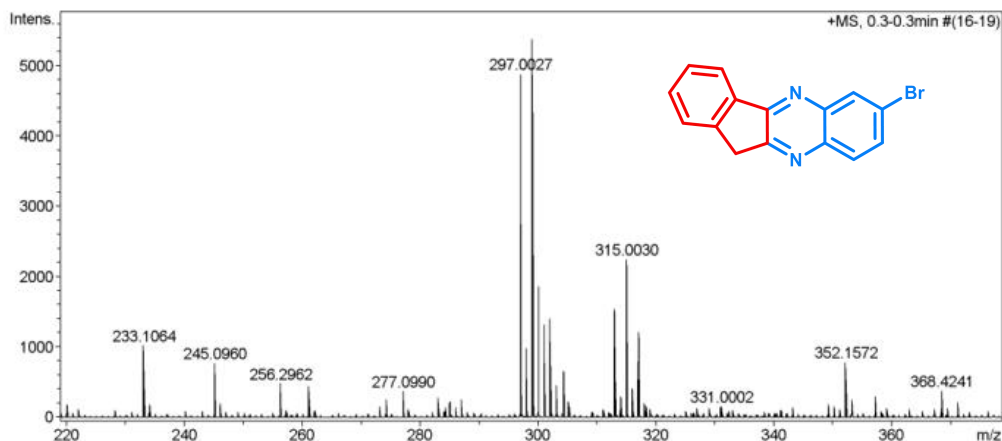

| Meas. m/z | Formula          | m/z      | err [mDa] | err [ppm] | mSigma | N-Rule | e <sup>-</sup> Conf | z  |
|-----------|------------------|----------|-----------|-----------|--------|--------|---------------------|----|
| 297.0027  | C 15 H 10 Br N 2 | 297.0022 | -0.5      | -1.6      | 466.27 | ok     | even                | 1+ |

Figure S41. Mass spectrum smartFormula report of compound 2.3ae-1.

## Mass Spectrum SmartFormula Report

### Analysis Info

Analysis Name D:\Data\USER-2021\LLG-1-29-1.d  
Method tune\_low\_NEW.m  
Sample Name LLG-1-28  
Comment

Acquisition Date 6/25/2021 2:22:01 PM

Operator Ma  
Instrument / Ser# micrOTOF-Q II 10203

### Acquisition Parameter

|             |            |                       |           |                  |           |
|-------------|------------|-----------------------|-----------|------------------|-----------|
| Source Type | ESI        | Ion Polarity          | Positive  | Set Nebulizer    | 0.8 Bar   |
| Focus       | Not active | Set Capillary         | 4500 V    | Set Dry Heater   | 180 °C    |
| Scan Begin  | 50 m/z     | Set End Plate Offset  | -500 V    | Set Dry Gas      | 6.0 l/min |
| Scan End    | 1200 m/z   | Set Collision Cell RF | 150.0 Vpp | Set Divert Valve | Source    |

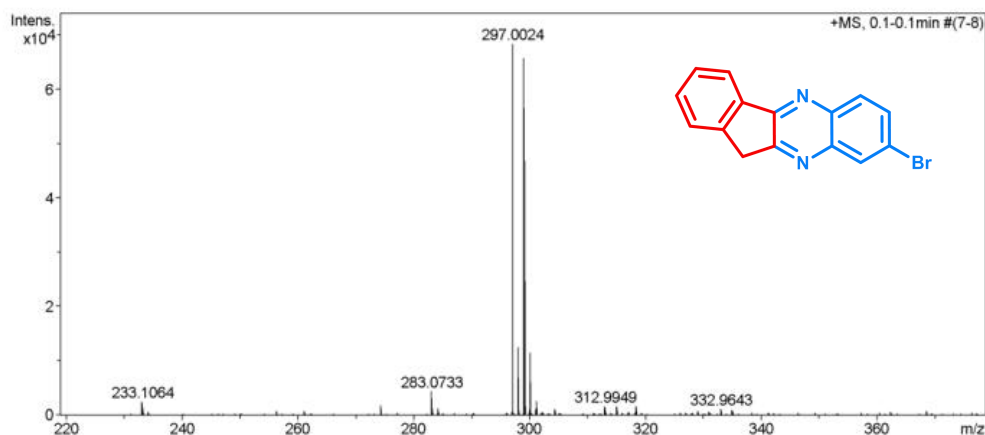

| Meas. m/z | Formula          | m/z      | err [mDa] | err [ppm] | mSigma | N-Rule | e <sup>-</sup> Conf | z  |
|-----------|------------------|----------|-----------|-----------|--------|--------|---------------------|----|
| 297.0024  | C 15 H 10 Br N 2 | 297.0022 | -0.2      | -0.8      | 12.61  | ok     | even                | 1+ |

Figure S42. Mass spectrum smartFormula report of compound 2.3ae-2.

## Mass Spectrum SmartFormula Report

### Analysis Info

Analysis Name D:\Data\USER-2021\LLG-1-34.d  
Method tune\_low\_NEW.m  
Sample Name LLG-1-34  
Comment

Acquisition Date 6/25/2021 2:28:55 PM

Operator Ma  
Instrument / Ser# micrOTOF-Q II 10203

### Acquisition Parameter

Source Type ESI  
Focus Not active  
Scan Begin 50 m/z  
Scan End 1200 m/z  
Ion Polarity Positive  
Set Capillary 4500 V  
Set End Plate Offset -500 V  
Set Collision Cell RF 150.0 Vpp

Set Nebulizer 0.8 Bar  
Set Dry Heater 180 °C  
Set Dry Gas 6.0 l/min  
Set Divert Valve Source

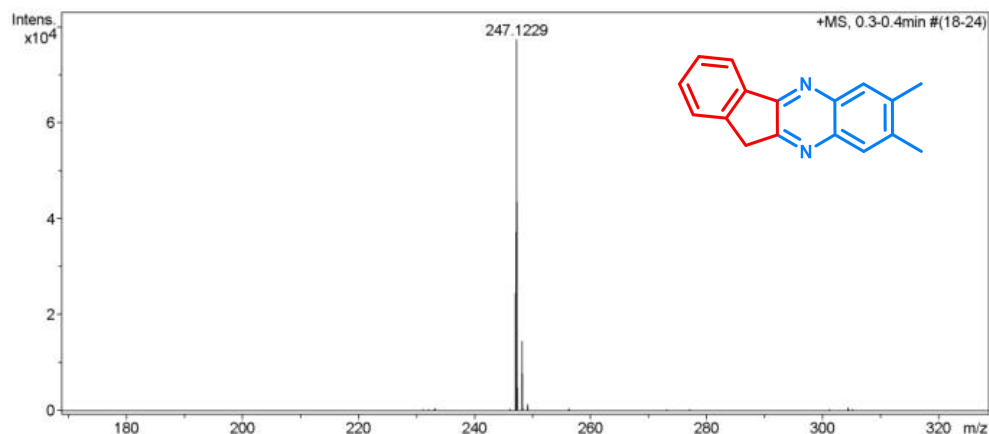

| Meas. m/z | Formula       | m/z      | err [mDa] | err [ppm] | mSigma | N-Rule | e <sup>-</sup> Conf | z  |
|-----------|---------------|----------|-----------|-----------|--------|--------|---------------------|----|
| 247.1229  | C 17 H 15 N 2 | 247.1230 | 0.1       | 0.5       | 2.28   | ok     | even                | 1+ |

Figure S43. Mass spectrum smartFormula report of compound 2.3af.

## Mass Spectrum SmartFormula Report

### Analysis Info

Analysis Name D:\Data\USER-2021\LLG-1-32.d  
Method tune\_low\_NEW.m  
Sample Name LLG-1-32  
Comment

Acquisition Date 6/25/2021 2:31:15 PM

Operator Ma  
Instrument / Ser# micrOTOF-Q II 10203

### Acquisition Parameter

Source Type ESI  
Focus Not active  
Scan Begin 50 m/z  
Scan End 1200 m/z  
Ion Polarity Positive  
Set Capillary 4500 V  
Set End Plate Offset -500 V  
Set Collision Cell RF 150.0 Vpp

Set Nebulizer 0.8 Bar  
Set Dry Heater 180 °C  
Set Dry Gas 6.0 l/min  
Set Divert Valve Source

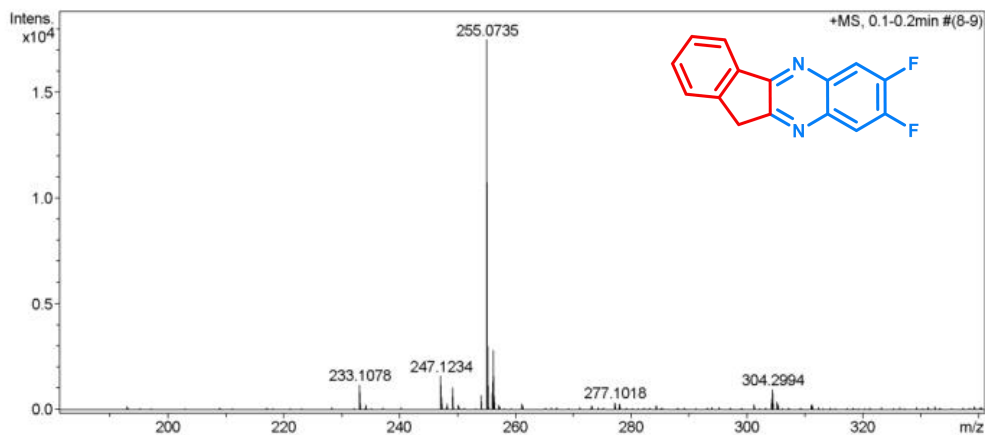

| Meas. m/z | Formula          | m/z      | err [mDa] | err [ppm] | mSigma | N-Rule | e <sup>-</sup> Conf | z  |
|-----------|------------------|----------|-----------|-----------|--------|--------|---------------------|----|
| 255.0735  | C 15 H 9 F 2 N 2 | 255.0728 | -0.7      | -2.6      | 5.31   | ok     | even                | 1+ |

Figure S44. Mass spectrum smartFormula report of compound 2.3ag.



## Mass Spectrum SmartFormula Report

### Analysis Info

Analysis Name D:\Data\USER-2021\LLG-1-39.d  
 Method tune\_low\_NEW.m  
 Sample Name LLG-1-39  
 Comment

Acquisition Date 6/25/2021 2:32:33 PM

Operator Ma  
 Instrument / Ser# micrOTOF-Q II 10203

### Acquisition Parameter

Source Type ESI  
 Focus Not active  
 Scan Begin 50 m/z  
 Scan End 1200 m/z  
 Ion Polarity Positive  
 Set Capillary 4500 V  
 Set End Plate Offset -500 V  
 Set Collision Cell RF 150.0 Vpp

Set Nebulizer 0.8 Bar  
 Set Dry Heater 180 °C  
 Set Dry Gas 6.0 l/min  
 Set Divert Valve Source

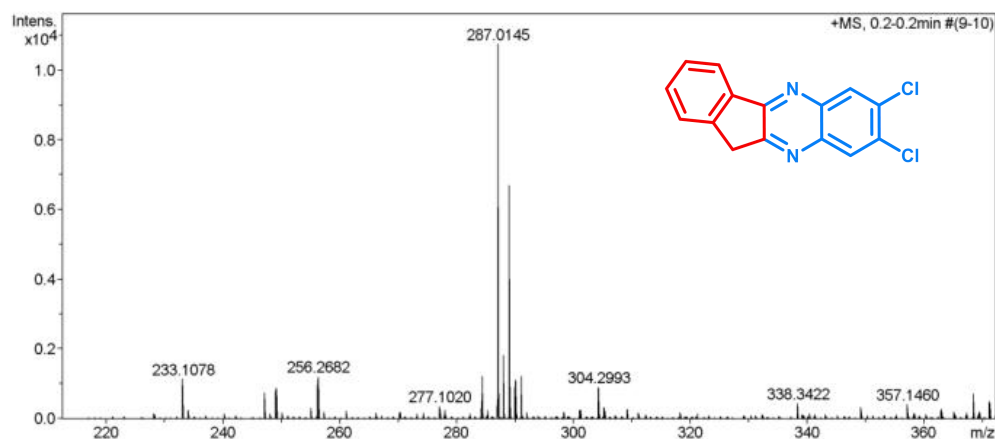

| Meas. m/z | Formula                                                       | m/z      | err [mDa] | err [ppm] | mSigma | N-Rule | e <sup>-</sup> Conf | z  |
|-----------|---------------------------------------------------------------|----------|-----------|-----------|--------|--------|---------------------|----|
| 287.0145  | C <sub>15</sub> H <sub>9</sub> Cl <sub>2</sub> N <sub>2</sub> | 287.0137 | -0.7      | -2.6      | 12.40  | ok     | even                | 1+ |

Figure S45. Mass spectrum smartFormula report of compound 2.3ah.

## Mass Spectrum SmartFormula Report

### Analysis Info

Analysis Name D:\Data\USER-2021\LLG-1-40.d  
 Method tune\_low\_NEW.m  
 Sample Name LLG-1-40  
 Comment

Acquisition Date 6/25/2021 2:34:34 PM

Operator Ma  
 Instrument / Ser# micrOTOF-Q II 10203

### Acquisition Parameter

Source Type ESI  
 Focus Not active  
 Scan Begin 50 m/z  
 Scan End 1200 m/z  
 Ion Polarity Positive  
 Set Capillary 4500 V  
 Set End Plate Offset -500 V  
 Set Collision Cell RF 150.0 Vpp

Set Nebulizer 0.8 Bar  
 Set Dry Heater 180 °C  
 Set Dry Gas 6.0 l/min  
 Set Divert Valve Source

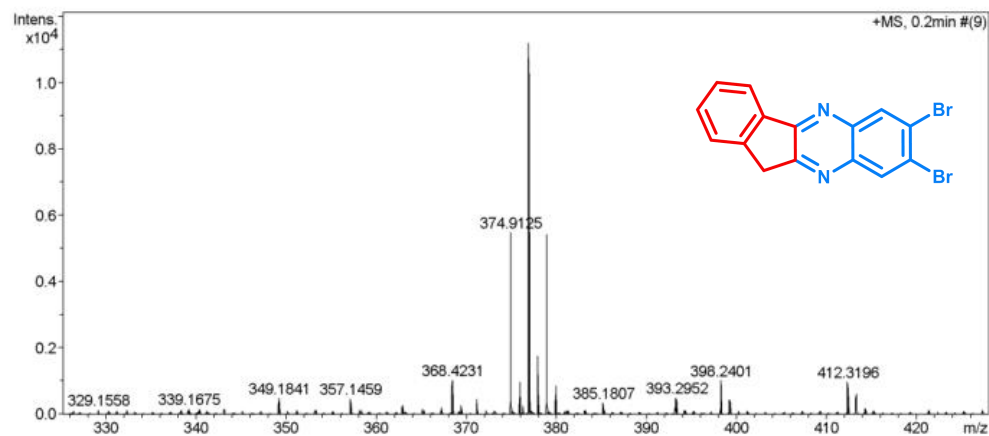

| Meas. m/z | Formula                                                       | m/z      | err [mDa] | err [ppm] | mSigma | N-Rule | e <sup>-</sup> Conf | z  |
|-----------|---------------------------------------------------------------|----------|-----------|-----------|--------|--------|---------------------|----|
| 374.9125  | C <sub>15</sub> H <sub>9</sub> Br <sub>2</sub> N <sub>2</sub> | 374.9127 | 0.2       | 0.6       | 466.03 | ok     | even                | 1+ |

Figure S46. Mass spectrum smartFormula report of compound 2.3ai.



## Mass Spectrum SmartFormula Report

### Analysis Info

Analysis Name D:\Data\USER-2021\LLG-1-33.d  
 Method tune\_low\_NEW.m  
 Sample Name LLG-1-33  
 Comment

Acquisition Date 6/25/2021 2:36:00 PM

Operator Ma  
 Instrument / Ser# micrOTOF-Q II 10203

### Acquisition Parameter

|             |            |                       |           |                  |           |
|-------------|------------|-----------------------|-----------|------------------|-----------|
| Source Type | ESI        | Ion Polarity          | Positive  | Set Nebulizer    | 0.8 Bar   |
| Focus       | Not active | Set Capillary         | 4500 V    | Set Dry Heater   | 180 °C    |
| Scan Begin  | 50 m/z     | Set End Plate Offset  | -500 V    | Set Dry Gas      | 6.0 l/min |
| Scan End    | 1200 m/z   | Set Collision Cell RF | 150.0 Vpp | Set Divert Valve | Source    |

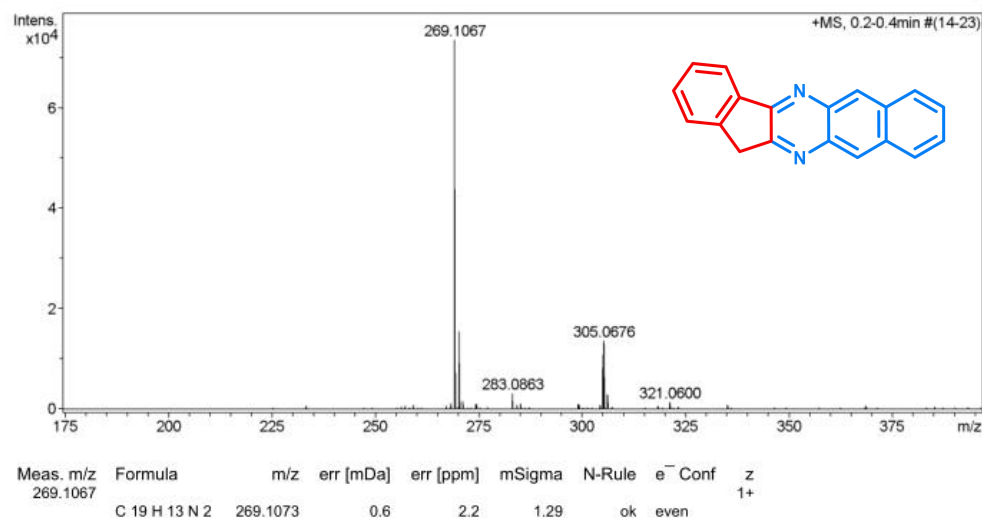

Figure S47. Mass spectrum smartFormula report of compound 2.3aj.

## Mass Spectrum SmartFormula Report

### Analysis Info

Analysis Name D:\data\USER-2021\LLG-1-41-1.d  
 Method tune\_low\_NEW.m  
 Sample Name LLG-1-41-1  
 Comment

Acquisition Date 6/25/2021 2:39:43 PM

Operator Ma  
 Instrument / Ser# micrOTOF-Q II 10203

### Acquisition Parameter

|             |            |                       |           |                  |           |
|-------------|------------|-----------------------|-----------|------------------|-----------|
| Source Type | ESI        | Ion Polarity          | Positive  | Set Nebulizer    | 0.8 Bar   |
| Focus       | Not active | Set Capillary         | 4500 V    | Set Dry Heater   | 180 °C    |
| Scan Begin  | 50 m/z     | Set End Plate Offset  | -500 V    | Set Dry Gas      | 6.0 l/min |
| Scan End    | 1200 m/z   | Set Collision Cell RF | 150.0 Vpp | Set Divert Valve | Source    |

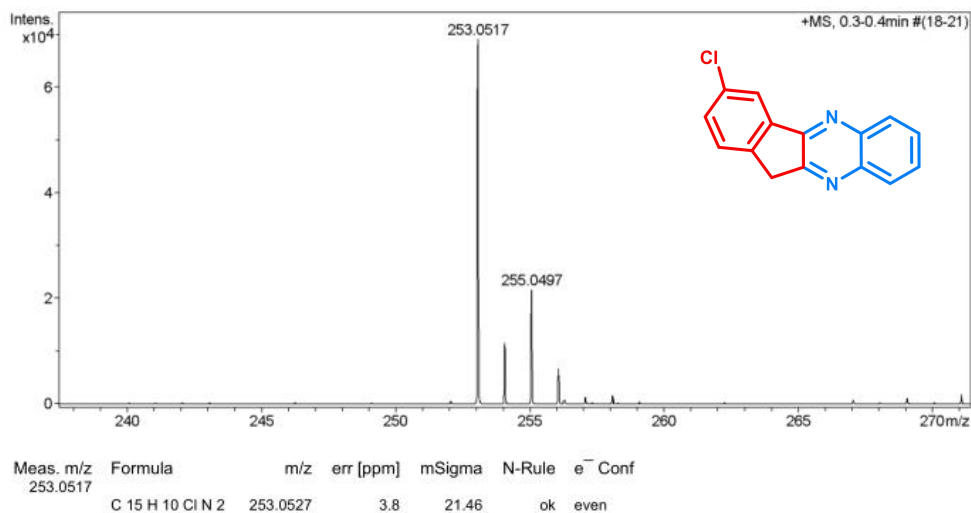

Figure S48. Mass spectrum smartFormula report of compound 2.3ba-1.

## Mass Spectrum SmartFormula Report

### Analysis Info

Analysis Name D:\Data\USER-2021\LLG-1-41-2.d  
 Method tune\_low\_NEW.m  
 Sample Name LLG-1-41-2  
 Comment

Acquisition Date 6/25/2021 2:41:38 PM

Operator Ma  
 Instrument / Ser# micrOTOF-Q II 10203

### Acquisition Parameter

|             |            |                       |           |                  |           |
|-------------|------------|-----------------------|-----------|------------------|-----------|
| Source Type | ESI        | Ion Polarity          | Positive  | Set Nebulizer    | 0.8 Bar   |
| Focus       | Not active | Set Capillary         | 4500 V    | Set Dry Heater   | 180 °C    |
| Scan Begin  | 50 m/z     | Set End Plate Offset  | -500 V    | Set Dry Gas      | 6.0 l/min |
| Scan End    | 1200 m/z   | Set Collision Cell RF | 150.0 Vpp | Set Divert Valve | Source    |

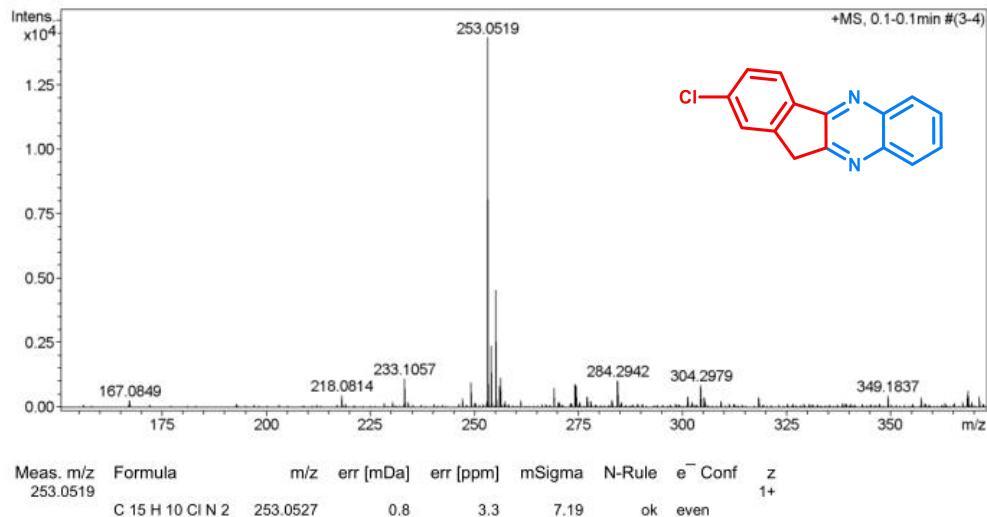

Figure S49. Mass spectrum smartFormula report of compound 2.3ba-2.

## Mass Spectrum SmartFormula Report

### Analysis Info

Analysis Name D:\Data\USER-2021\LLG-1-42-2.d  
 Method tune\_low\_NEW.m  
 Sample Name LLG-1-42-2  
 Comment

Acquisition Date 6/25/2021 2:44:04 PM

Operator Ma  
 Instrument / Ser# micrOTOF-Q II 10203

### Acquisition Parameter

|             |            |                       |           |                  |           |
|-------------|------------|-----------------------|-----------|------------------|-----------|
| Source Type | ESI        | Ion Polarity          | Positive  | Set Nebulizer    | 0.8 Bar   |
| Focus       | Not active | Set Capillary         | 4500 V    | Set Dry Heater   | 180 °C    |
| Scan Begin  | 50 m/z     | Set End Plate Offset  | -500 V    | Set Dry Gas      | 6.0 l/min |
| Scan End    | 1200 m/z   | Set Collision Cell RF | 150.0 Vpp | Set Divert Valve | Source    |

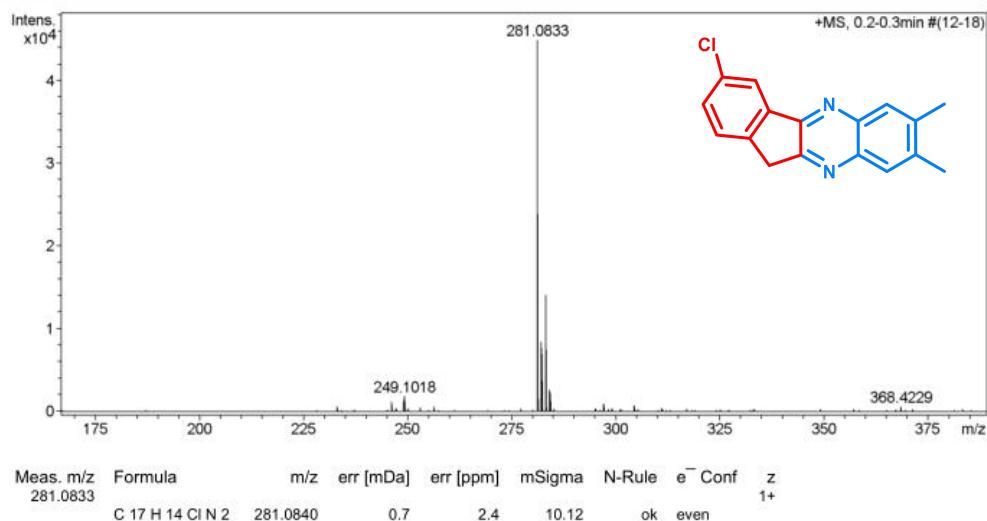

Figure S50. Mass spectrum smartFormula report of compound 2.3bb-1.

## Mass Spectrum SmartFormula Report

### Analysis Info

Analysis Name D:\Data\USER-2021\LLG-1-42-1.d  
 Method tune\_low\_NEW.m  
 Sample Name LLG-1-42-1  
 Comment

Acquisition Date 6/25/2021 2:42:52 PM

Operator Ma  
 Instrument / Ser# microTOF-Q II 10203

### Acquisition Parameter

|             |            |                       |           |                  |           |
|-------------|------------|-----------------------|-----------|------------------|-----------|
| Source Type | ESI        | Ion Polarity          | Positive  | Set Nebulizer    | 0.8 Bar   |
| Focus       | Not active | Set Capillary         | 4500 V    | Set Dry Heater   | 180 °C    |
| Scan Begin  | 50 m/z     | Set End Plate Offset  | -500 V    | Set Dry Gas      | 6.0 l/min |
| Scan End    | 1200 m/z   | Set Collision Cell RF | 150.0 Vpp | Set Divert Valve | Source    |

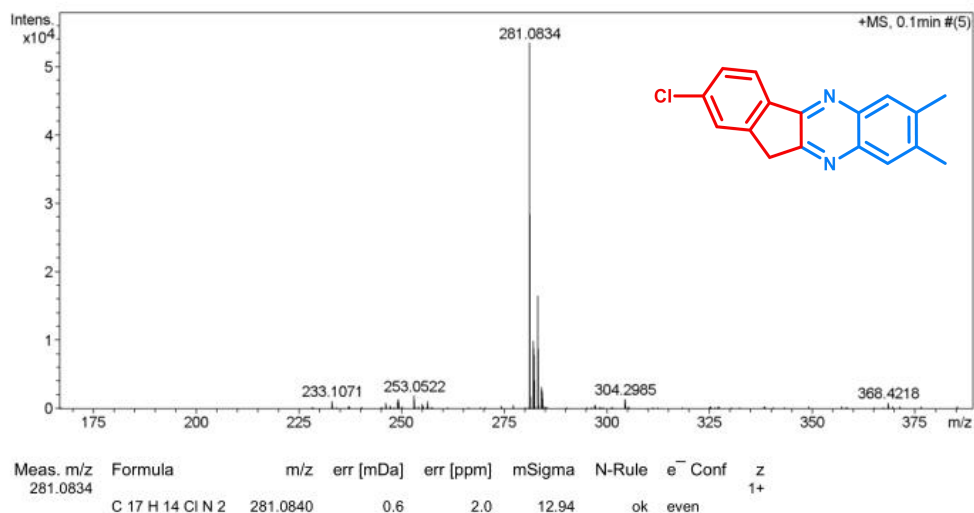

Figure S51. Mass spectrum smartFormula report of compound 2.3bb-2.

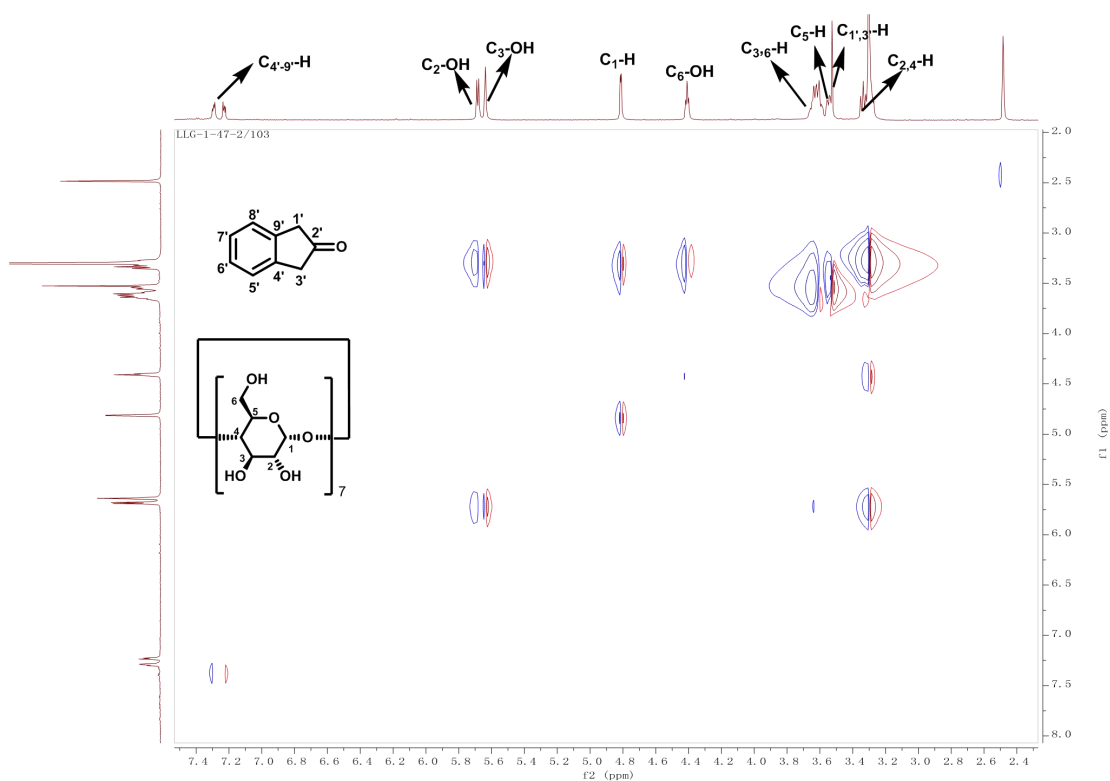

Figure S52. The NOESY spectrum of 2-indenone (1.0 eqv.) and  $\beta$ -CD (15 mol%) mixed after stirring in water for 12h.

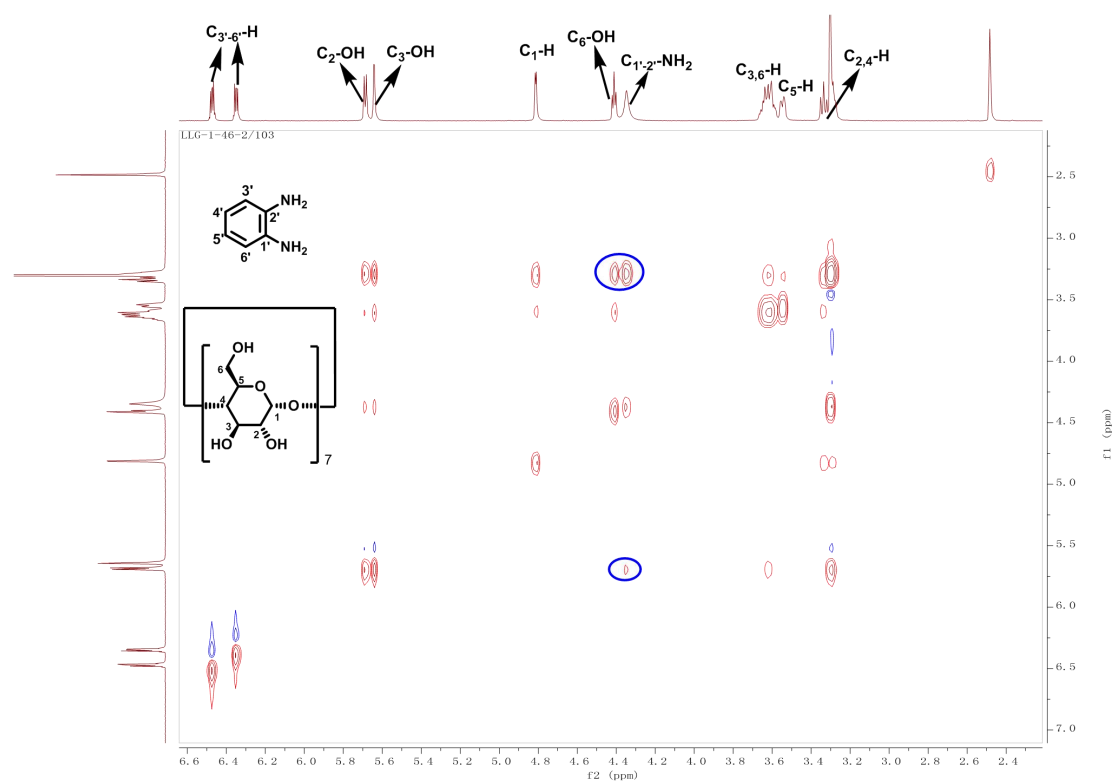

**Figure S53.** The NOESY spectrum of OPD (1.2 eqv.) and  $\beta$ -CD (15 mol%) mixed after stirring in water for 12h.

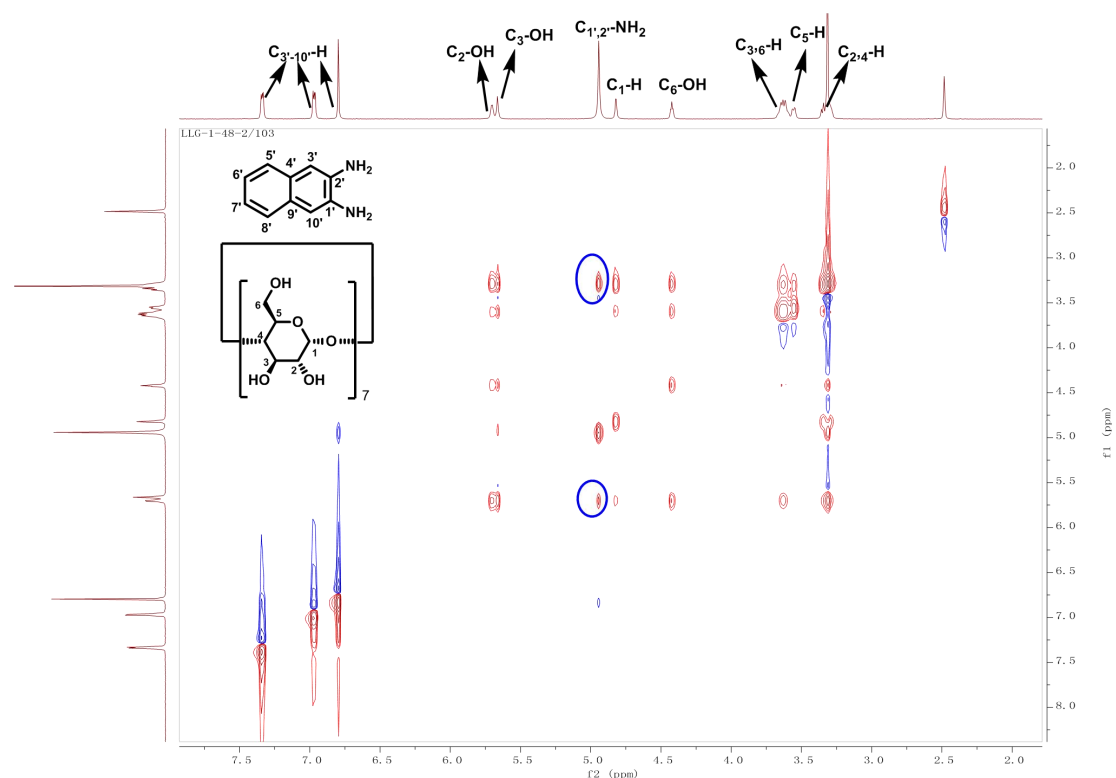

**Figure S54.** The NOESY spectrum of 2,3-diaminonaphthalene (1.2 eqv.) and  $\beta$ -CD (15 mol%) mixed after stirring in water for 12h.

## Analysis Information

|                |                                           |                                    |                                           |
|----------------|-------------------------------------------|------------------------------------|-------------------------------------------|
| Item name:     | MS-20220104                               | Analysis Method Item name:         | MS-NOPDA-0916                             |
| Version:       | 3                                         | Analysis Method Version:           | 2                                         |
| Modified date: | Jan 04, 2022 14:25:44 China Standard Time | Sample Set Created date:           | Jan 04, 2022 11:07:11 China Standard Time |
| Modified by:   | Waters, Waters                            | Sample Set Instrument system name: | UPLC_QToF_2                               |
| Folder:        | Company/sample/2022                       |                                    |                                           |

MS Instrument Type: Waters Vion® IMS QToF

## Experiment Settings:

|                          |         |            |          |
|--------------------------|---------|------------|----------|
| Experiment type:         | ESI+    | Scan Mode: | MS       |
| Capillary voltage:       | 3.0 kV  | Low mass:  | 50 m/z   |
| Source temperature:      | 120°C   | High mass: | 2000 m/z |
| Desolvation temperature: | 450°C   | Scan time: | 0.200 s  |
| Cone gas:                | 50 L/h  |            |          |
| Desolvation gas:         | 800 L/h |            |          |

Item name: 20220104-LLG20220103, Sample position: 1:A,8, Replicate number: 1

|   | Formula                                          | Neutral mass (Da) | Observed m/z | Mass error (mDa) | Mass error (ppm) | Response | Adducts | Identification status |
|---|--------------------------------------------------|-------------------|--------------|------------------|------------------|----------|---------|-----------------------|
| 1 | C <sub>15</sub> H <sub>14</sub> N <sub>2</sub>   | 222.11570         | 223.12199    | -1.0             | -4.4             | 67393    | +H      | Identified            |
| 2 | C <sub>15</sub> H <sub>12</sub> N <sub>2</sub> O | 236.09496         | 237.10165    | -0.6             | -2.5             | 3955403  | +H, -e  | Identified            |

Item name: 20220104-LLG20220103

Channel name: Time 0.1835 +/- 0.0500 minutes

Item description:

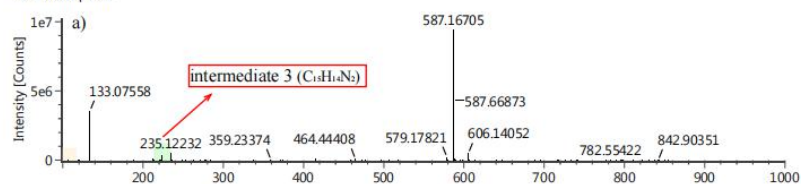

Item name: 20220104-LLG20220103

Channel name: Time 0.1233 +/- 0.0500 minutes

Item description:

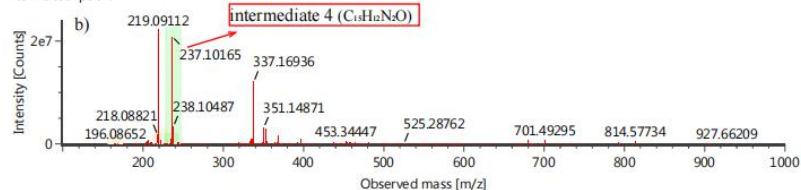

UNIFI page 1 of 2

Item name: 20220104-LLG20220103

Channel name: Time 0.1835 +/- 0.0500 minutes

Item description:

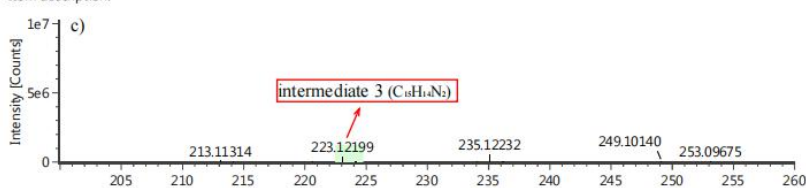

Item name: 20220104-LLG20220103

Channel name: Time 0.1233 +/- 0.0500 minutes

Item description:

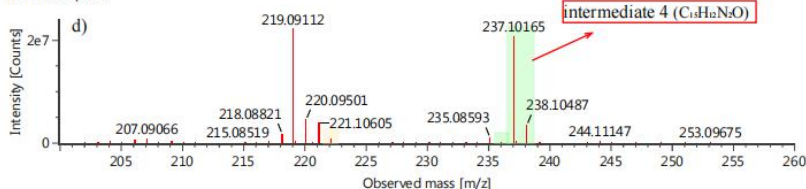

**Figure S55.** The HRMS of template reaction (**2.1a** (0.2 mmol), **2.2a** (0.24 mmol) and  $\beta$ -CD (15 %) in air) in water after 1h: **a)** the extraction mass spectrometry of intermediate **3**; **b)** the extraction mass spectrometry of intermediate **4**; **c)** the enlarged view of the abscissa of **Figure S55a**; **c)** the enlarged view of the abscissa of **Figure S55b**.
